# Supplementary material for: A novel family of small molecule HIF-1 alpha stabilizers for the treatment of diabetic wounds; an integratedin silico,in vitro, andin vivostrategy
Source: Royal Society of Chemistry journal article supplement (doi:10.1039/d2ra05364k), 2022-01-01

## TABLES

**Table 1. Selected molecules form literature survey:**

|                                                                                                                                                                                                                                                                                                                                                                                                                                                      |                                                                                                                                                                                                                                                                                                                                                                                                                                                  |
|------------------------------------------------------------------------------------------------------------------------------------------------------------------------------------------------------------------------------------------------------------------------------------------------------------------------------------------------------------------------------------------------------------------------------------------------------|--------------------------------------------------------------------------------------------------------------------------------------------------------------------------------------------------------------------------------------------------------------------------------------------------------------------------------------------------------------------------------------------------------------------------------------------------|
| 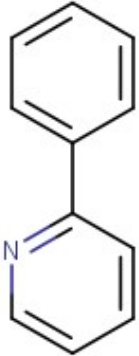 <p>Chemical structure of 1-phenylpyridine, consisting of a benzene ring attached to the nitrogen atom of a pyridine ring.</p>                                                                                                                                                                                                                                      |  <p>Chemical structure of 1-phenylimidazole, consisting of a benzene ring attached to the nitrogen atom of an imidazole ring.</p>                                                                                                                                                                                                                             |
|  <p>Chemical structure of 1-benzopyridine, a bicyclic system consisting of a benzene ring fused to a pyridine ring.</p>                                                                                                                                                                                                                                            |  <p>Chemical structure of 1,2-bis(pyridin-2-yl)benzene, consisting of a central benzene ring with two pyridine rings attached at the 1 and 2 positions.</p>                                                                                                                                                                                                  |
|  <p>Chemical structure of a complex heterocyclic molecule. It features a central pyridine ring substituted with a methyl group (CH<sub>3</sub>), a hydroxyl group (OH), and a benzoyl group (C(=O)Ph). This pyridine ring is further substituted with a 2-phenoxyphenyl group and a 2-aminopropanoic acid side chain (NH-CH<sub>2</sub>-CH<sub>2</sub>-COOH).</p> |  <p>Chemical structure of a complex chiral molecule. It features a central benzene ring substituted with a benzoyl group (C(=O)Ph). This benzene ring is further substituted with a 2-aminopropanoic acid side chain (NH-CH<sub>2</sub>-CH<sub>2</sub>-COOH) and a 2-amino-3-methylbutanoic acid side chain (NH-CH(CH<sub>3</sub>)-CH<sub>2</sub>-COOH).</p> |

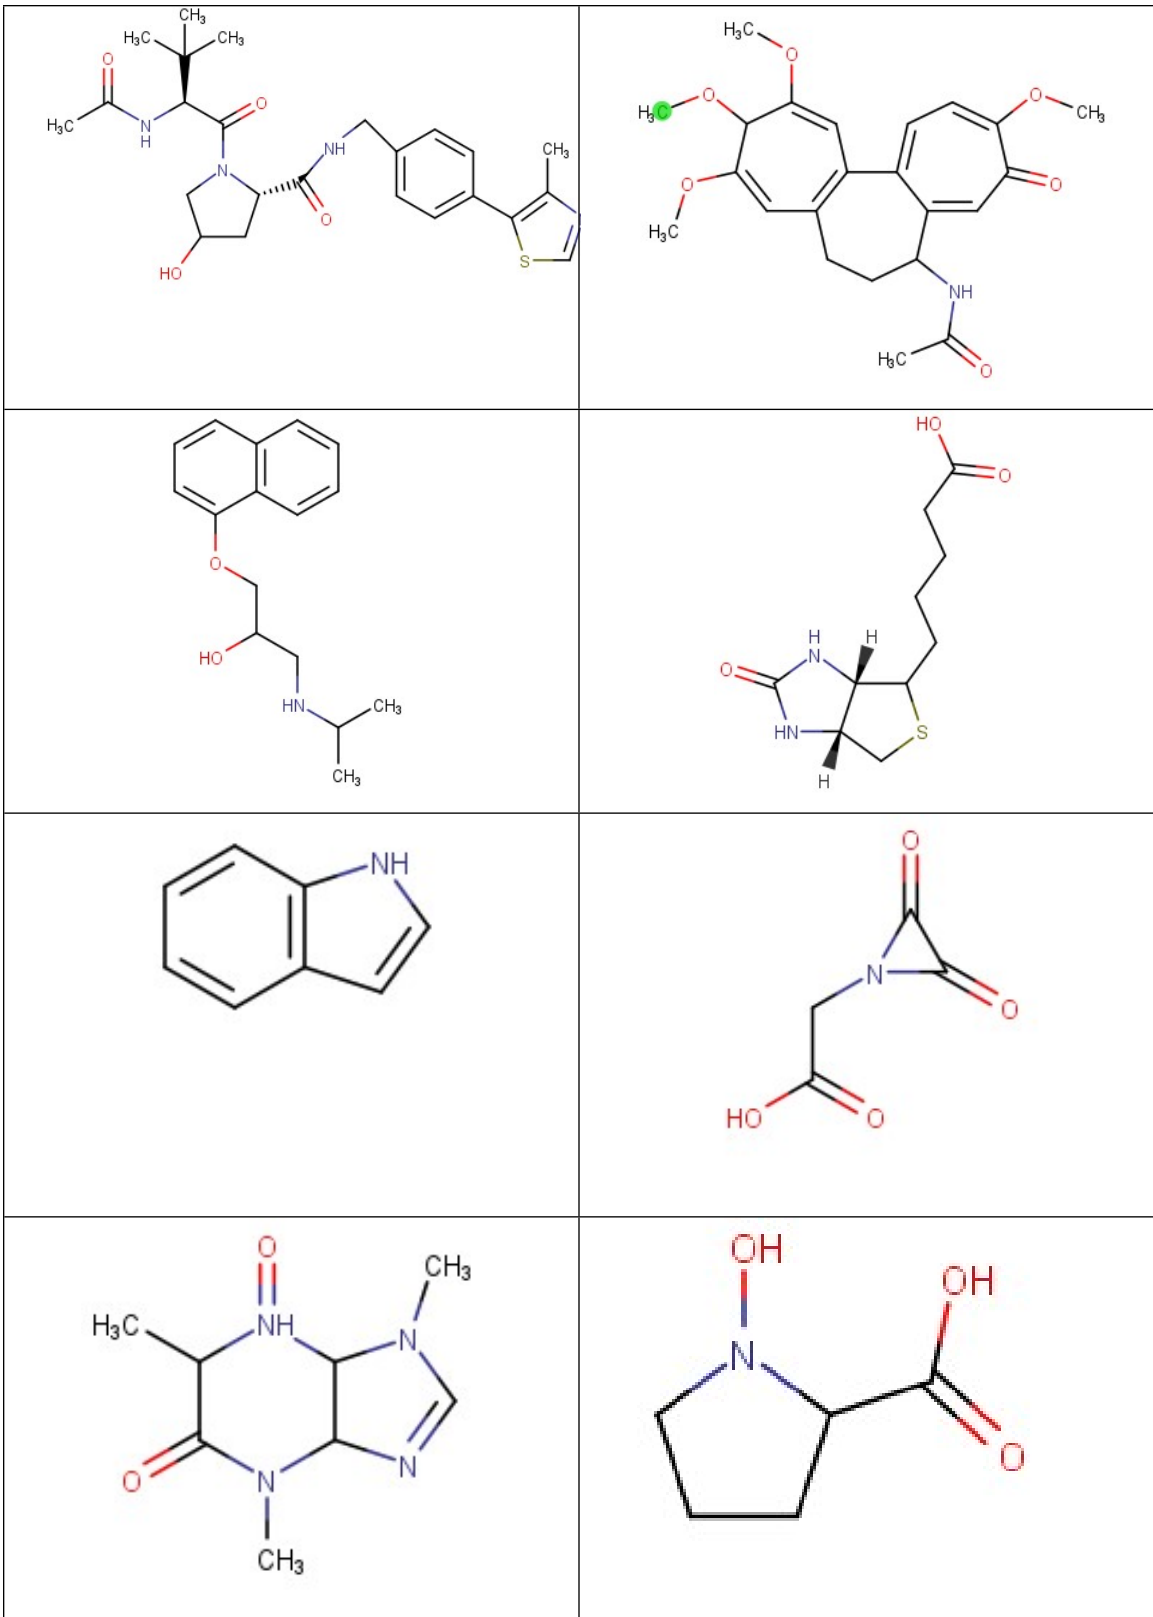

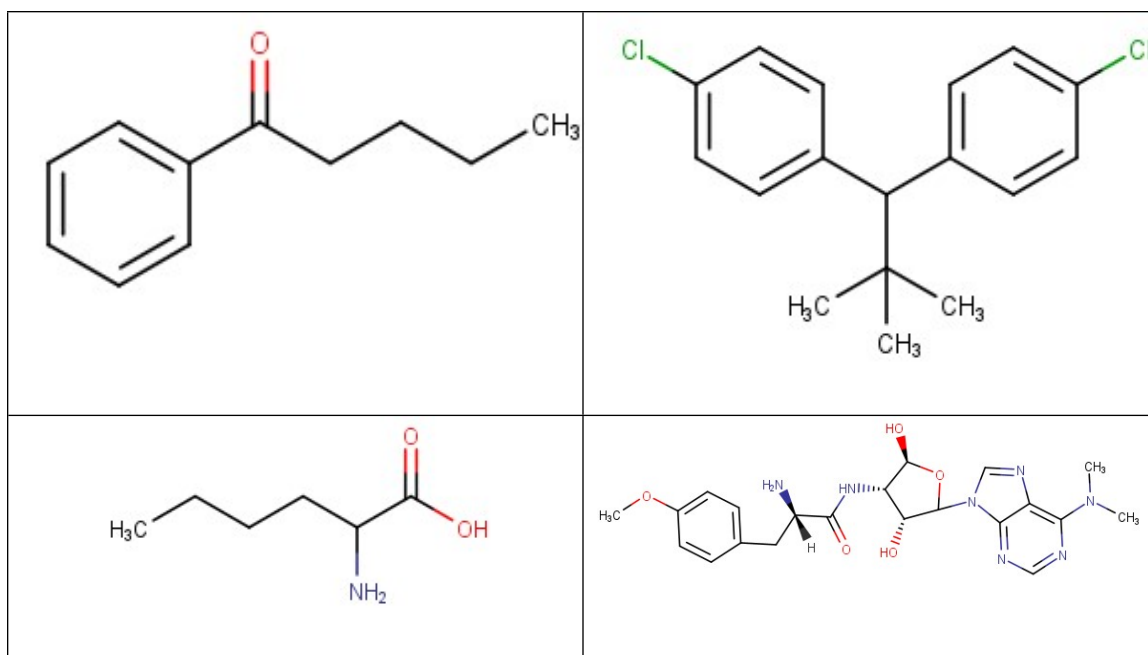

**Table 2. List of scaffolds generated from pharmacophore modelling by Zinc pharmer:**

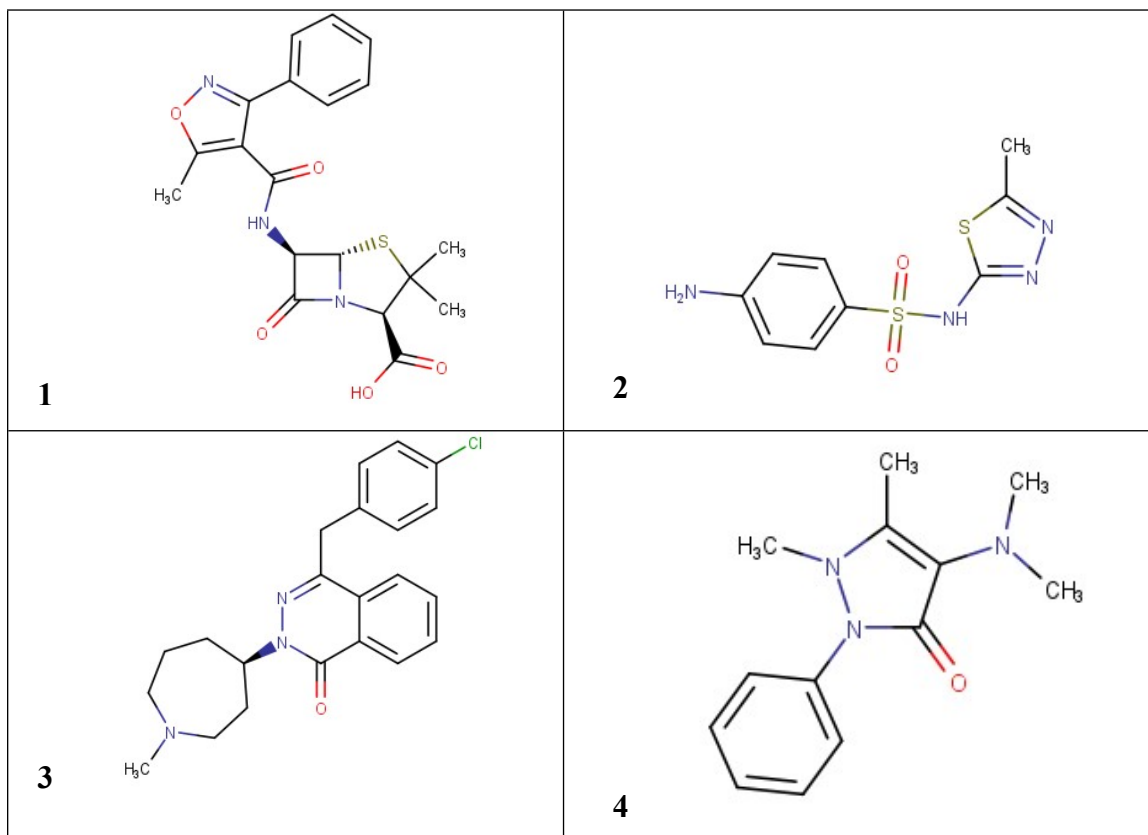

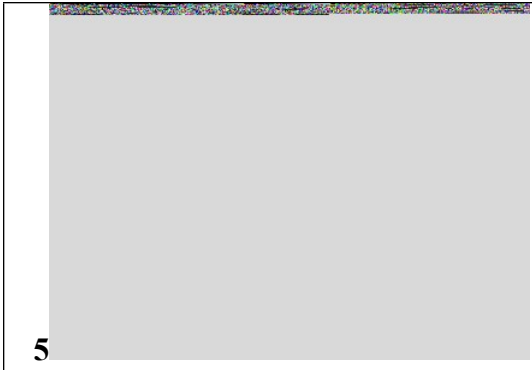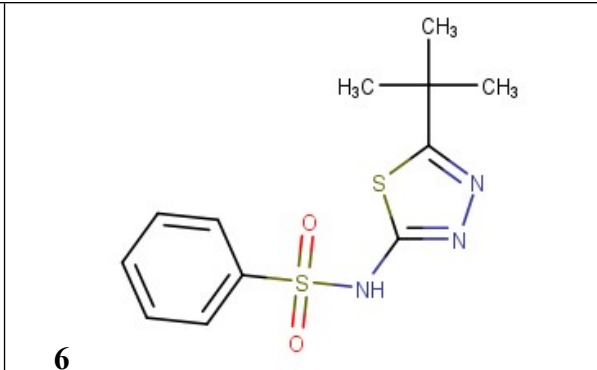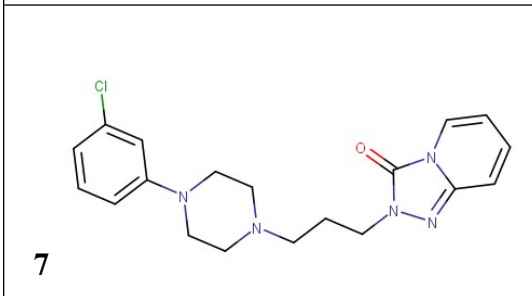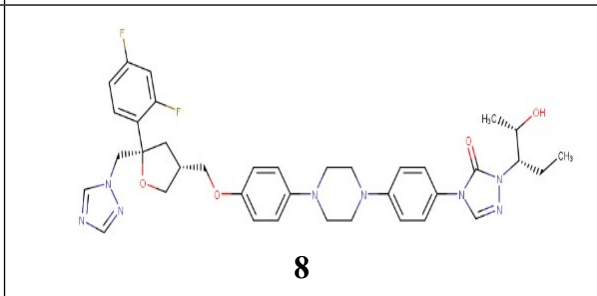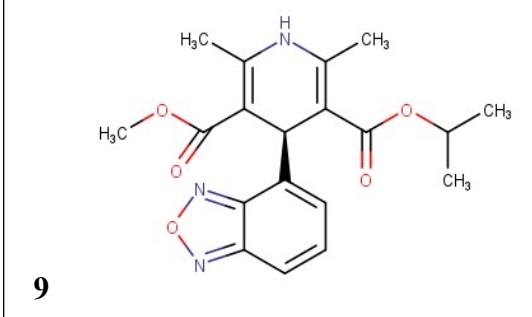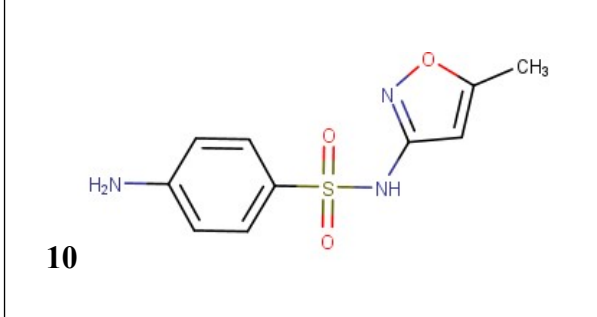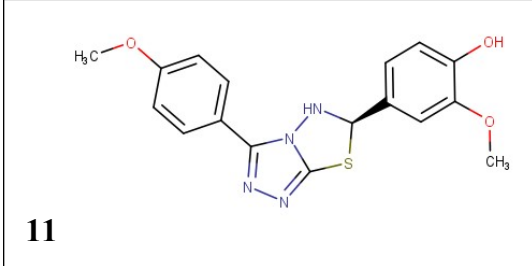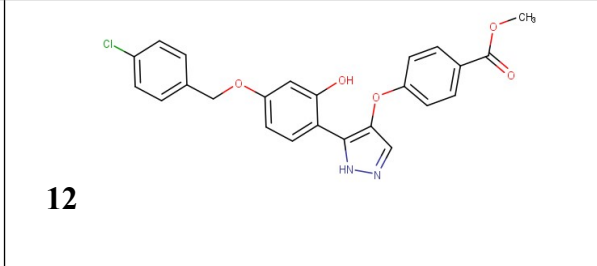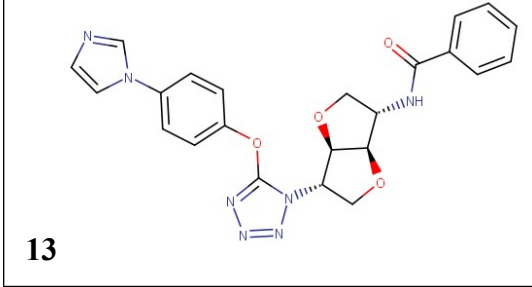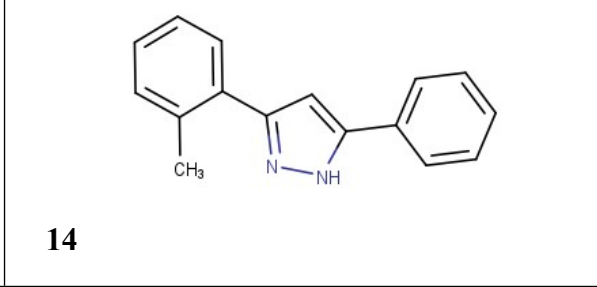

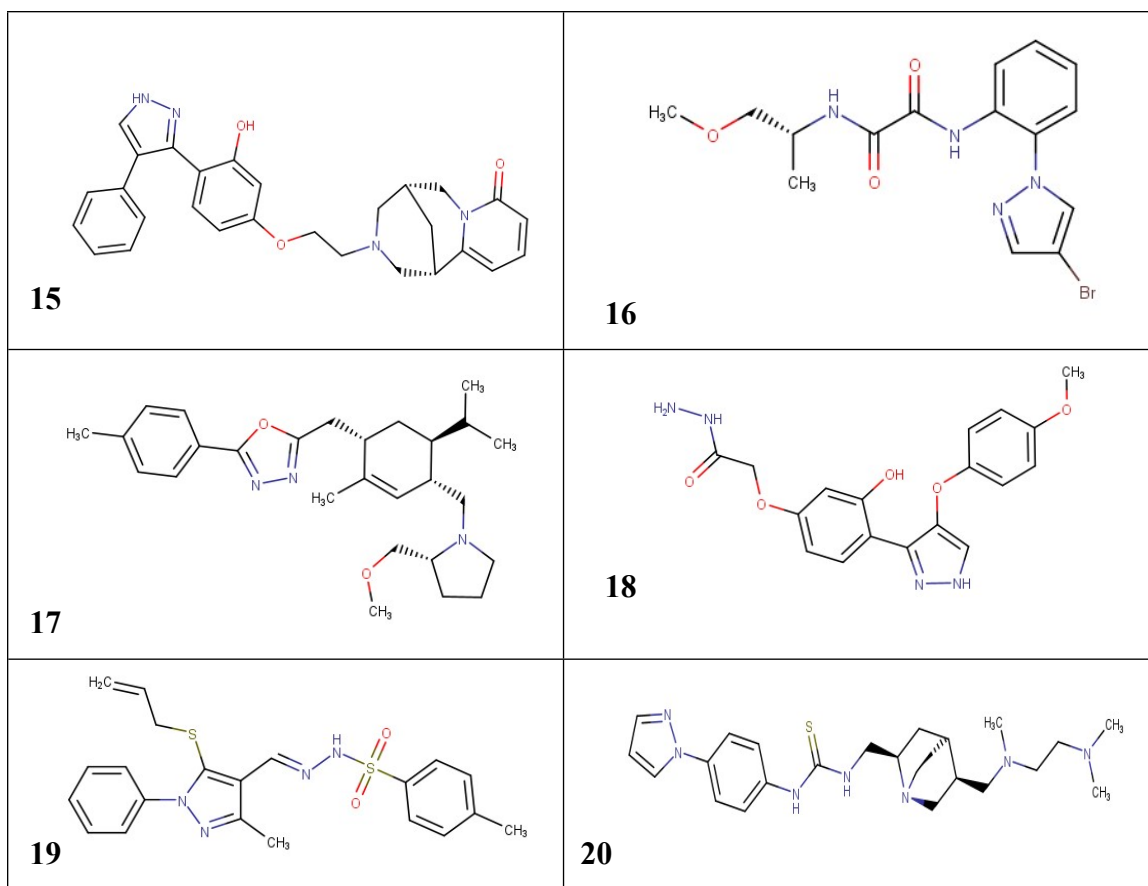

**Table 3. List of designed novel molecules:**

| Compound code | 2D Images                                                                            |
|---------------|--------------------------------------------------------------------------------------|
| <b>CDEA</b>   | 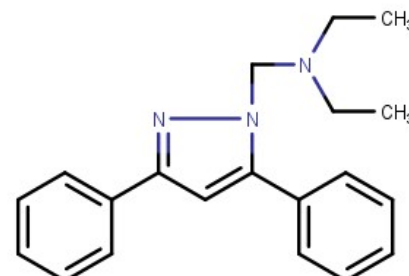 |
| <b>CDIPA</b>  |  |

|                                                |                                                                                     |
|------------------------------------------------|-------------------------------------------------------------------------------------|
| <p style="text-align: center;"><b>CDPA</b></p> | 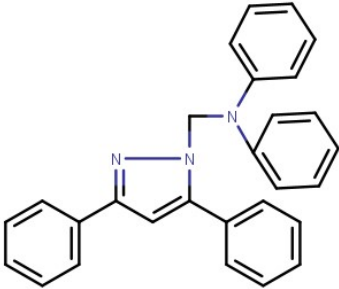  |
| <p style="text-align: center;"><b>CI</b></p>   |   |
| <p style="text-align: center;"><b>CP</b></p>   |  |

**Table 4. Binding affinity and 2D interactions of top HITS:**

| S NO                                        | Binding affinity                               | 2D interaction image                                                                                                                                                                                                                                                                                                                                                                                                                                                    |
|---------------------------------------------|------------------------------------------------|-------------------------------------------------------------------------------------------------------------------------------------------------------------------------------------------------------------------------------------------------------------------------------------------------------------------------------------------------------------------------------------------------------------------------------------------------------------------------|
| <p style="text-align: center;"><b>1</b></p> | <p style="text-align: center;"><b>-5.6</b></p> | 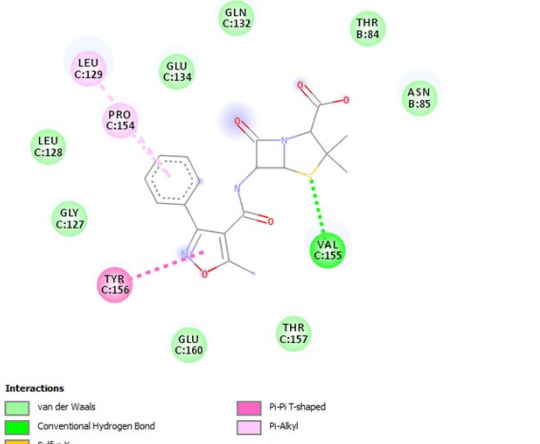 <p><b>Interactions</b></p> <ul style="list-style-type: none"> <li><span style="color: green;">■</span> van der Waals</li> <li><span style="color: red;">■</span> Conventional Hydrogen Bond</li> <li><span style="color: yellow;">■</span> Sulfur-X</li> <li><span style="color: blue;">■</span> Pi-Pi T-shaped</li> <li><span style="color: purple;">■</span> Pi-Alkyl</li> </ul> |

|          |             |                                                                                                                                                                                                                                                                                                                         |
|----------|-------------|-------------------------------------------------------------------------------------------------------------------------------------------------------------------------------------------------------------------------------------------------------------------------------------------------------------------------|
| <p>2</p> | <p>-4.7</p> | 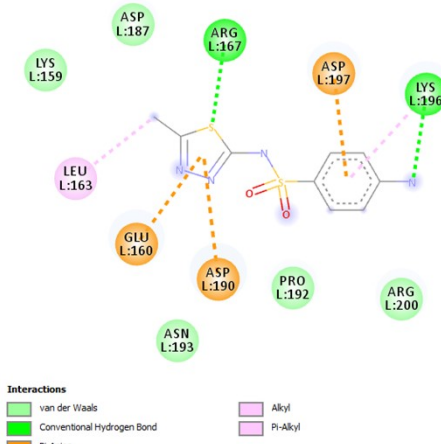 <p><b>Interactions</b></p> <ul style="list-style-type: none"> <li>van der Waals</li> <li>Conventional Hydrogen Bond</li> <li>Pi-Anion</li> <li>Alkyl</li> <li>Pi-Alkyl</li> </ul>                                                    |
| <p>3</p> | <p>12.6</p> |  <p><b>Interactions</b></p> <ul style="list-style-type: none"> <li>van der Waals</li> <li>Unfavorable Bump</li> <li>Carbon Hydrogen Bond</li> <li>Pi-Anion</li> <li>Pi-Lone Pair</li> <li>Amide-Pi Stacked</li> <li>Alkyl</li> </ul> |
| <p>4</p> | <p>-6.6</p> |  <p><b>Interactions</b></p> <ul style="list-style-type: none"> <li>van der Waals</li> <li>Carbon Hydrogen Bond</li> <li>Sulfur-X</li> <li>Amide-Pi Stacked</li> <li>Pi-Alkyl</li> </ul>                                             |

|          |             |                                                                                                                                                                                                                                                                                                                                     |
|----------|-------------|-------------------------------------------------------------------------------------------------------------------------------------------------------------------------------------------------------------------------------------------------------------------------------------------------------------------------------------|
| <p>5</p> | <p>7.5</p>  | 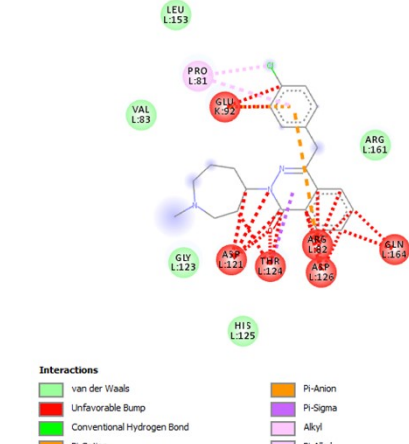 <p><b>Interactions</b></p> <ul style="list-style-type: none"> <li>van der Waals</li> <li>Unfavorable Bump</li> <li>Conventional Hydrogen Bond</li> <li>Pi-Cation</li> <li>Pi-Anion</li> <li>Pi-Sigma</li> <li>Alkyl</li> <li>Pi-Alkyl</li> </ul> |
| <p>6</p> | <p>-3.7</p> |  <p><b>Interactions</b></p> <ul style="list-style-type: none"> <li>van der Waals</li> <li>Pi-Anion</li> <li>Amide-Pi Stacked</li> <li>Alkyl</li> </ul>                                                                                           |
| <p>7</p> | <p>4.6</p>  |  <p><b>Interactions</b></p> <ul style="list-style-type: none"> <li>van der Waals</li> <li>Unfavorable Bump</li> <li>Pi-Anion</li> <li>Pi-Sigma</li> <li>Pi-Alkyl</li> </ul>                                                                     |



|    |      |                                                                                                                                                                                                                                                                                                                   |
|----|------|-------------------------------------------------------------------------------------------------------------------------------------------------------------------------------------------------------------------------------------------------------------------------------------------------------------------|
| 8  | 3.3  | 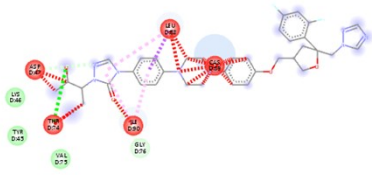 <p><b>Interactions</b></p> <ul style="list-style-type: none"> <li>van der Waals</li> <li>Unfavorable Bump</li> <li>Conventional Hydrogen Bond</li> <li>Carbon Hydrogen Bond</li> <li>Pi-Sigma</li> <li>Pi-Alkyl</li> </ul>     |
| 9  | -7.2 |  <p><b>Interactions</b></p> <ul style="list-style-type: none"> <li>van der Waals</li> <li>Unfavorable Bump</li> <li>Carbon Hydrogen Bond</li> <li>Unfavorable Acceptor-Acceptor</li> <li>Pi-Sigma</li> <li>Pi-Alkyl</li> </ul> |
| 10 | -5.0 |  <p><b>Interactions</b></p> <ul style="list-style-type: none"> <li>van der Waals</li> <li>Conventional Hydrogen Bond</li> <li>Pi-Anion</li> <li>Pi-Sigma</li> <li>Pi-Sulfur</li> <li>Alkyl</li> <li>Pi-Alkyl</li> </ul>       |

|           |             |                                                                                                                                                                                                                                                             |
|-----------|-------------|-------------------------------------------------------------------------------------------------------------------------------------------------------------------------------------------------------------------------------------------------------------|
| <p>11</p> | <p>12.8</p> | <p><b>Interactions</b></p> <ul style="list-style-type: none"> <li>van der Waals</li> <li>Unfavorable Bump</li> <li>Conventional Hydrogen Bond</li> <li>Carbon Hydrogen Bond</li> <li>Pi-Anion</li> <li>Pi-Sigma</li> <li>Alkyl</li> <li>Pi-Alkyl</li> </ul> |
| <p>12</p> | <p>6.5</p>  | <p><b>Interactions</b></p> <ul style="list-style-type: none"> <li>van der Waals</li> <li>Unfavorable Bump</li> <li>Carbon Hydrogen Bond</li> <li>Pi-Pi T-shaped</li> <li>Alkyl</li> <li>Pi-Alkyl</li> </ul>                                                 |
| <p>13</p> | <p>-0.8</p> | <p><b>Interactions</b></p> <ul style="list-style-type: none"> <li>van der Waals</li> <li>Unfavorable Bump</li> <li>Pi-Sigma</li> <li>Pi-Alkyl</li> </ul>                                                                                                    |

|           |             |                                                                                                                                                                                                                                                                                    |
|-----------|-------------|------------------------------------------------------------------------------------------------------------------------------------------------------------------------------------------------------------------------------------------------------------------------------------|
| <p>14</p> | <p>-7.5</p> | 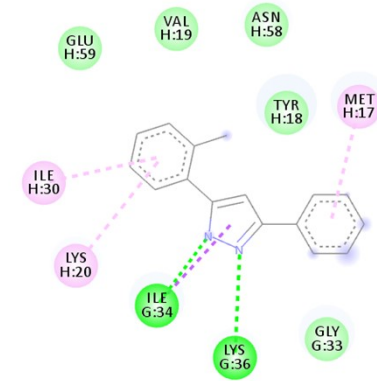 <p><b>Interactions</b></p> <ul style="list-style-type: none"> <li>van der Waals</li> <li>Conventional Hydrogen Bond</li> <li>Pi-Sigma</li> <li>Pi-Alkyl</li> </ul>                              |
| <p>15</p> | <p>9.2</p>  |  <p><b>Interactions</b></p> <ul style="list-style-type: none"> <li>van der Waals</li> <li>Unfavorable Bump</li> <li>Pi-Pi T-shaped</li> <li>Alkyl</li> <li>Pi-Alkyl</li> </ul>                  |
| <p>16</p> | <p>-6.5</p> |  <p><b>Interactions</b></p> <ul style="list-style-type: none"> <li>van der Waals</li> <li>Carbon Hydrogen Bond</li> <li>Pi-Anion</li> <li>Pi-Sigma</li> <li>Alkyl</li> <li>Pi-Alkyl</li> </ul> |

|           |             |                                                                                                                                                                                                                                                                                                                                |
|-----------|-------------|--------------------------------------------------------------------------------------------------------------------------------------------------------------------------------------------------------------------------------------------------------------------------------------------------------------------------------|
| <p>17</p> | <p>5.5</p>  | 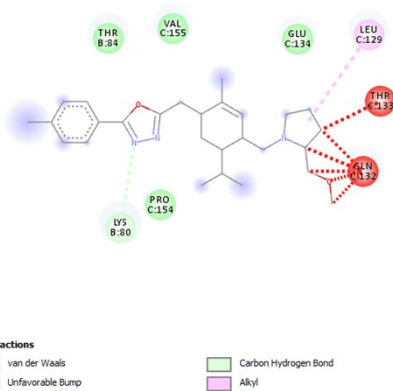 <p><b>Interactions</b></p> <ul style="list-style-type: none"> <li>van der Waals</li> <li>Unfavorable Bump</li> <li>Carbon Hydrogen Bond</li> <li>Alkyl</li> </ul>                                                                           |
| <p>18</p> | <p>-7.8</p> |  <p><b>Interactions</b></p> <ul style="list-style-type: none"> <li>van der Waals</li> <li>Conventional Hydrogen Bond</li> <li>Carbon Hydrogen Bond</li> <li>Pi-Donor Hydrogen Bond</li> <li>Alkyl</li> <li>Pi-Alkyl</li> </ul>              |
| <p>19</p> | <p>3.6</p>  |  <p><b>Interactions</b></p> <ul style="list-style-type: none"> <li>van der Waals</li> <li>Unfavorable Bump</li> <li>Conventional Hydrogen Bond</li> <li>Carbon Hydrogen Bond</li> <li>Pi-Anion</li> <li>Alkyl</li> <li>Pi-Alkyl</li> </ul> |

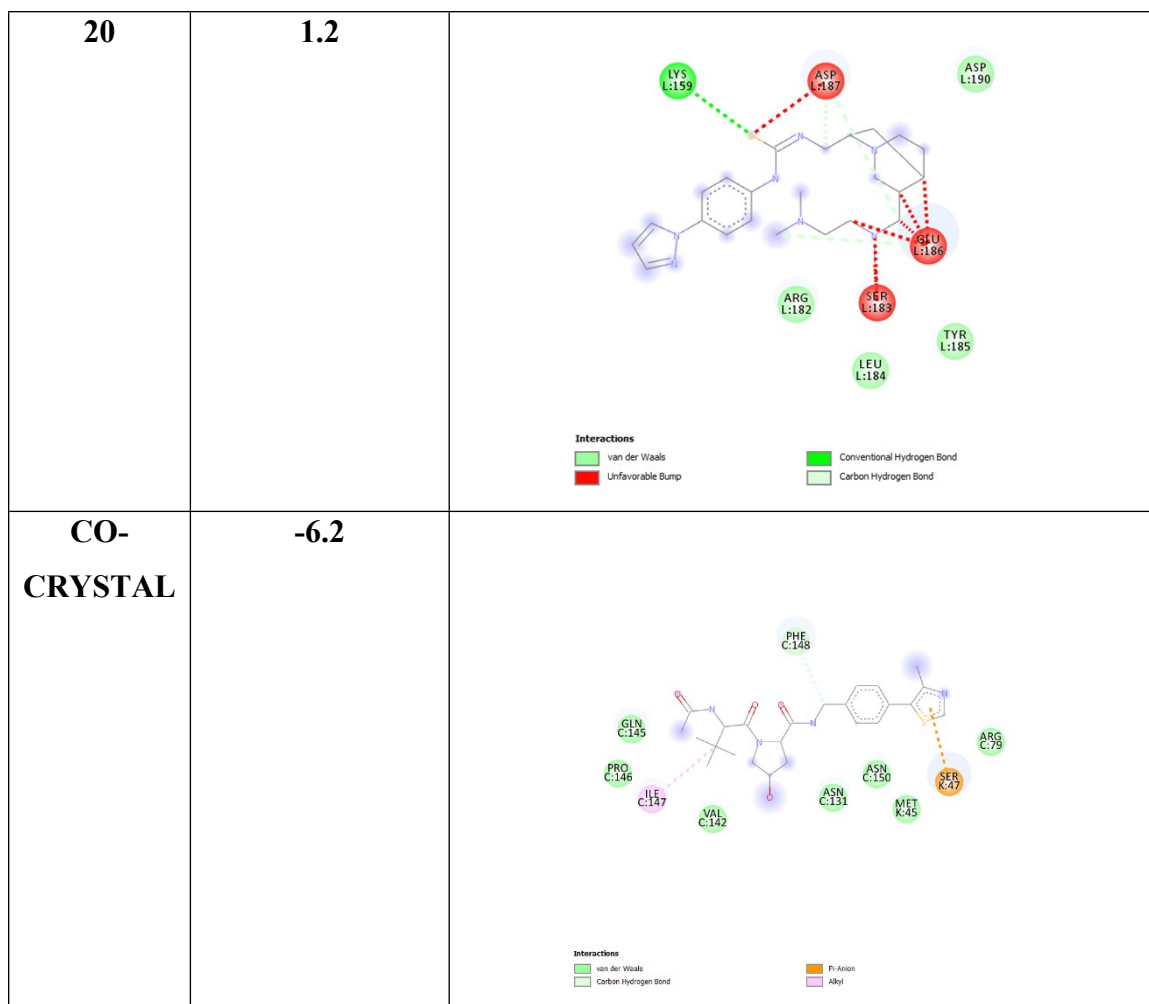

**Table 5. Physical characterization data of synthesized compounds:**

| S.NO. | Sample code | Mol. formula                                   | Mol. Weight | Melting point(°C) | Rf value | Yield (%) | Color (Powder) |
|-------|-------------|------------------------------------------------|-------------|-------------------|----------|-----------|----------------|
| 1     | CP          | C <sub>19</sub> H <sub>16</sub> N <sub>4</sub> | 300.365     | 135-140           | 0.52     | 85        | White          |
| 2     | CI          | C <sub>19</sub> H <sub>16</sub> N <sub>4</sub> | 300.365     | 140-145           | 0.36     | 79        | White          |
| 3     | CDPA        | C <sub>28</sub> H <sub>23</sub> N <sub>3</sub> | 401.513     | 135-145           | 0.21     | 86        | White          |
| 4     | CDEA        | C <sub>20</sub> H <sub>23</sub> N <sub>3</sub> | 305.425     | 155-160           | 0.42     | 86        | White          |
| 5     | CDIPA       | C <sub>22</sub> H <sub>27</sub> N <sub>3</sub> | 333.479     | 175-180           | 0.64     | 86        | White          |

**Table 6. Wound size of the rat with days**

| Groups             | Wound size (mm) |       |        |        |
|--------------------|-----------------|-------|--------|--------|
|                    | Day 3           | Day 7 | Day 11 | Day 15 |
| Control            | 18.7            | 18.4  | 17.6   | 15.5   |
| Low dose 75mg/Kg   | 18.1            | 17.4  | 15.3   | 13.3   |
| High dose 150mg/Kg | 17.4            | 16.6  | 12.0   | 8.1    |

**FIGURE**

**Figure 1. Primary output page**

**Input Molecules** [view details: visualization of the detected features](#)

| #  | Molecule | Atoms | Features | Spatial Features | Aromatic | Hydrophobic | Donors | Acceptors | Negatives | Positives |
|----|----------|-------|----------|------------------|----------|-------------|--------|-----------|-----------|-----------|
| 1  | 1.mol2   | 19    | 4        | 4                | 2        | 0           | 0      | 1         | 0         | 1         |
| 2  | 4.mol2   | 20    | 4        | 4                | 2        | 0           | 0      | 2         | 0         | 0         |
| 3  | 2.mol2   | 19    | 4        | 4                | 2        | 0           | 0      | 1         | 0         | 1         |
| 4  | 17.mol2  | 21    | 9        | 8                | 0        | 4           | 1      | 3         | 1         | 0         |
| 5  | 3.mol2   | 23    | 4        | 4                | 3        | 0           | 0      | 1         | 0         | 0         |
| 6  | 7.mol2   | 65    | 19       | 18               | 2        | 8           | 3      | 6         | 0         | 0         |
| 7  | 15.mol2  | 26    | 5        | 5                | 1        | 3           | 0      | 1         | 0         | 0         |
| 8  | 14.mol2  | 16    | 6        | 6                | 0        | 1           | 0      | 4         | 1         | 0         |
| 9  | 9.mol2   | 40    | 9        | 7                | 2        | 2           | 2      | 3         | 0         | 0         |
| 10 | 16.mol2  | 37    | 11       | 11               | 2        | 9           | 0      | 0         | 0         | 0         |
| 11 | 13.mol2  | 28    | 7        | 7                | 0        | 3           | 1      | 3         | 0         | 0         |
| 12 | 10.mol2  | 16    | 4        | 3                | 2        | 0           | 1      | 0         | 0         | 1         |
| 13 | 8.mol2   | 57    | 21       | 21               | 0        | 14          | 1      | 6         | 0         | 0         |
| 14 | 12.mol2  | 15    | 8        | 6                | 0        | 0           | 2      | 5         | 1         | 0         |
| 15 | 18.mol2  | 62    | 20       | 17               | 3        | 4           | 5      | 8         | 0         | 0         |
| 16 | 11.mol2  | 16    | 4        | 3                | 2        | 0           | 1      | 0         | 0         | 1         |
| 17 | 6.mol2   | 75    | 24       | 24               | 1        | 15          | 3      | 5         | 0         | 0         |
| 18 | 5.mol2   | 41    | 13       | 12               | 3        | 1           | 2      | 6         | 1         | 0         |

**Figure 2. The figure displays parts of the main output page obtained for input with eighteen HIF-mimetics.**

[Sort by score](#)

Number of Aligned Molecules: 10

| Score  | Jmol                 | Features | Spatial Features | Aromatic | Hydrophobic | Donors | Acceptors | Negatives | Positives | Molecules                                                                  |
|--------|----------------------|----------|------------------|----------|-------------|--------|-----------|-----------|-----------|----------------------------------------------------------------------------|
| 14.230 | <a href="#">Jmol</a> | 3        | 3                | 0        | 0           | 0      | 3         | 0         | 0         | 12.mol2 17.mol2 14.mol2 9.mol2 8.mol2 18.mol2 6.mol2 5.mol2 13.mol2 7.mol2 |

Number of Aligned Molecules: 9

| Score  | Jmol                 | Features | Spatial Features | Aromatic | Hydrophobic | Donors | Acceptors | Negatives | Positives | Molecules                                                          |
|--------|----------------------|----------|------------------|----------|-------------|--------|-----------|-----------|-----------|--------------------------------------------------------------------|
| 13.500 | <a href="#">Jmol</a> | 3        | 3                | 0        | 0           | 1      | 2         | 0         | 0         | 6.mol2 7.mol2 8.mol2 12.mol2 18.mol2 5.mol2 9.mol2 13.mol2 17.mol2 |
| 10.945 | <a href="#">Jmol</a> | 3        | 3                | 0        | 1           | 0      | 2         | 0         | 0         | 14.mol2 17.mol2 7.mol2 9.mol2 8.mol2 18.mol2 6.mol2 5.mol2 13.mol2 |

Number of Aligned Molecules: 8

| Score  | Jmol                 | Features | Spatial Features | Aromatic | Hydrophobic | Donors | Acceptors | Negatives | Positives | Molecules                                                   |
|--------|----------------------|----------|------------------|----------|-------------|--------|-----------|-----------|-----------|-------------------------------------------------------------|
| 24.875 | <a href="#">Jmol</a> | 3        | 3                | 2        | 0           | 0      | 1         | 0         | 0         | 2.mol2 1.mol2 4.mol2 3.mol2 7.mol2 9.mol2 18.mol2 5.mol2    |
| 13.500 | <a href="#">Jmol</a> | 3        | 3                | 0        | 0           | 1      | 2         | 0         | 0         | 12.mol2 17.mol2 7.mol2 8.mol2 18.mol2 6.mol2 5.mol2 13.mol2 |
| 10.436 | <a href="#">Jmol</a> | 3        | 3                | 0        | 1           | 0      | 2         | 0         | 0         | 14.mol2 17.mol2 7.mol2 8.mol2 18.mol2 6.mol2 5.mol2 13.mol2 |
| 9.900  | <a href="#">Jmol</a> | 3        | 3                | 0        | 1           | 1      | 1         | 0         | 0         | 17.mol2 7.mol2 13.mol2 8.mol2 18.mol2 6.mol2 9.mol2 5.mol2  |
| 9.334  | <a href="#">Jmol</a> | 3        | 3                | 0        | 1           | 0      | 2         | 0         | 0         | 7.mol2 8.mol2 18.mol2 6.mol2 5.mol2 17.mol2 9.mol2 13.mol2  |

Number of Aligned Molecules: 7

| Score  | Jmol                 | Features | Spatial Features | Aromatic | Hydrophobic | Donors | Acceptors | Negatives | Positives | Molecules                                           |
|--------|----------------------|----------|------------------|----------|-------------|--------|-----------|-----------|-----------|-----------------------------------------------------|
| 13.576 | <a href="#">Jmol</a> | 4        | 4                | 0        | 1           | 0      | 3         | 0         | 0         | 14.mol2 17.mol2 8.mol2 18.mol2 6.mol2 9.mol2 5.mol2 |
| 9.334  | <a href="#">Jmol</a> | 3        | 3                | 0        | 1           | 1      | 1         | 0         | 0         | 17.mol2 9.mol2 18.mol2 6.mol2 5.mol2 7.mol2 8.mol2  |
| 8.731  | <a href="#">Jmol</a> | 3        | 3                | 0        | 1           | 1      | 1         | 0         | 0         | 5.mol2 17.mol2 13.mol2 8.mol2 9.mol2 6.mol2 18.mol2 |
| 8.731  | <a href="#">Jmol</a> | 3        | 3                | 0        | 1           | 0      | 2         | 0         | 0         | 5.mol2 17.mol2 8.mol2 6.mol2 7.mol2 9.mol2 13.mol2  |
| 5.940  | <a href="#">Jmol</a> | 3        | 3                | 0        | 2           | 0      | 1         | 0         | 0         | 6.mol2 17.mol2 7.mol2 15.mol2 8.mol2 18.mol2 9.mol2 |
| 5.940  | <a href="#">Jmol</a> | 3        | 3                | 0        | 2           | 0      | 1         | 0         | 0         | 8.mol2 17.mol2 7.mol2 15.mol2 6.mol2 9.mol2 18.mol2 |

**Figure 3.** Pharmacophore output page describes the top-scoring candidate pharmacophore model.

Pharmacophore features:

| Score  | Features | Spatial Features | Aromatic | Hydrophobic | Donors | Acceptors | Negatives | Positives |
|--------|----------|------------------|----------|-------------|--------|-----------|-----------|-----------|
| 24.875 | 3        | 3                | 2        | 0           | 0      | 1         | 0         | 0         |

  

| Molecule Name | Show Molecule: | Show Features: |
|---------------|----------------|----------------|
| 2*            |                |                |
| 1             |                |                |
| 4             |                |                |
| 3             |                |                |
| 7             |                |                |
| 9             |                |                |
| 18            |                |                |
| 5             |                |                |

\* pivot molecule

[Download Pharmacophore and Alignment File](#)

**Figure 4.** Generated pharmacophore in ZINCPharmer.

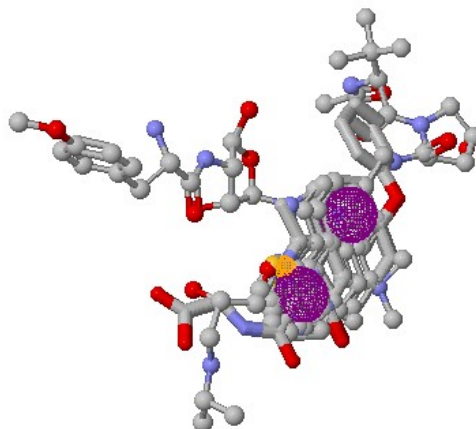

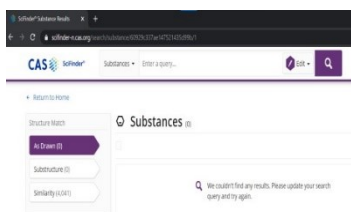

Pyrazole derivative

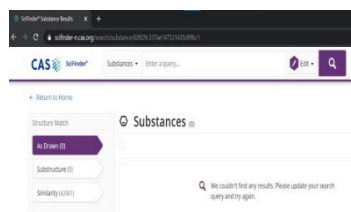

Imidazole derivative

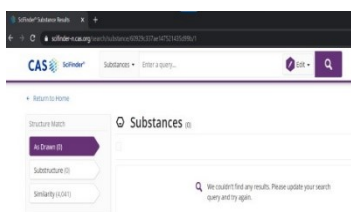

Diphenylamine derivative

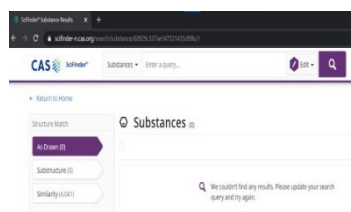

Diethylamine derivative

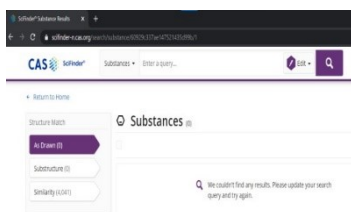

Diisopropylamine derivative

**Figure 5. Sci-finder results of the compounds**

**Figure 6. Structure of 4W9H protein**



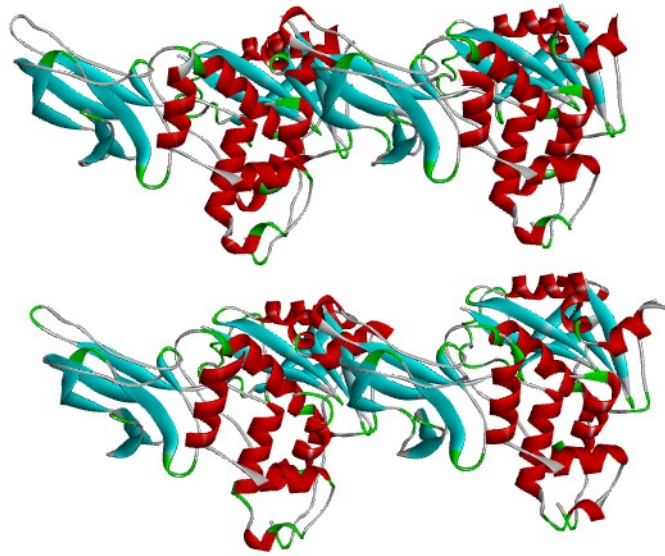

**Figure 7. Ramachandran plot**

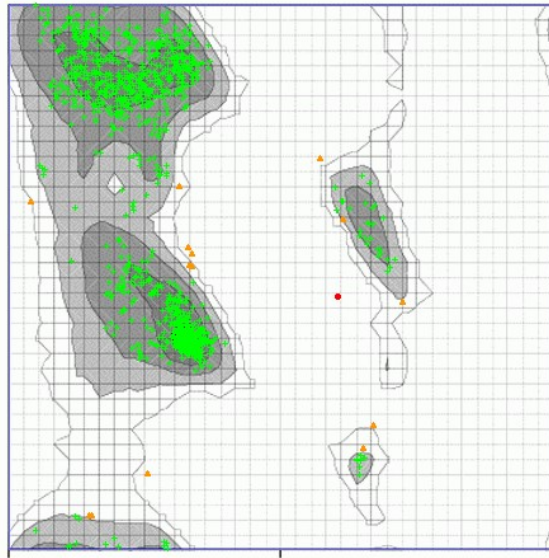

**Figure 8. Egg model**

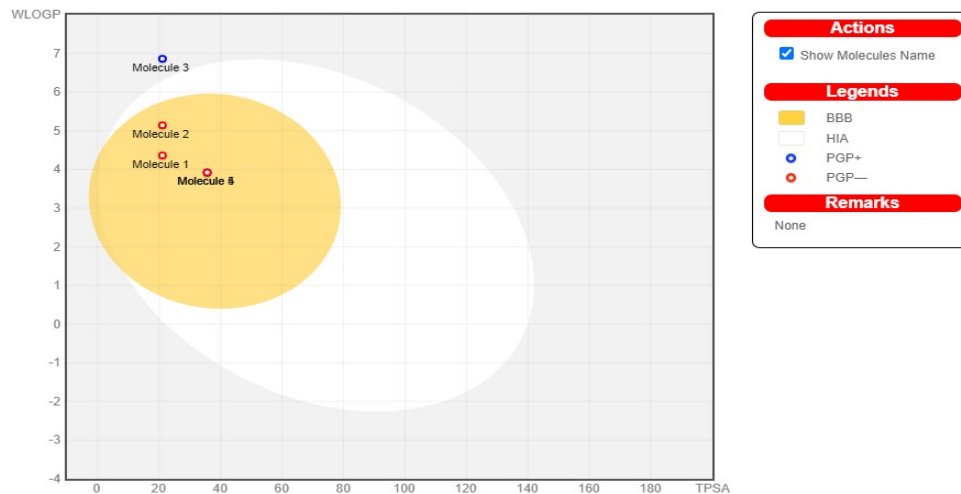

**Figure 9. Synthesized pyrazole analogues**

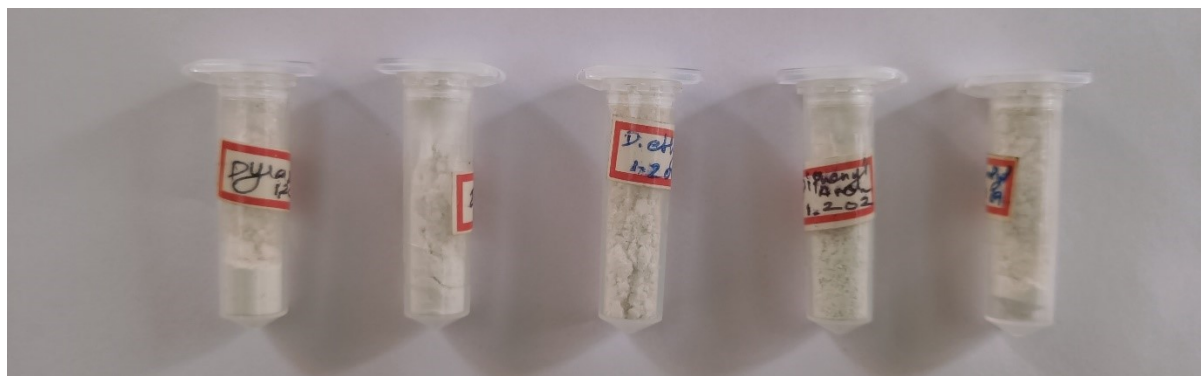

**Figure 10. Mass fragmentation of compound CI**

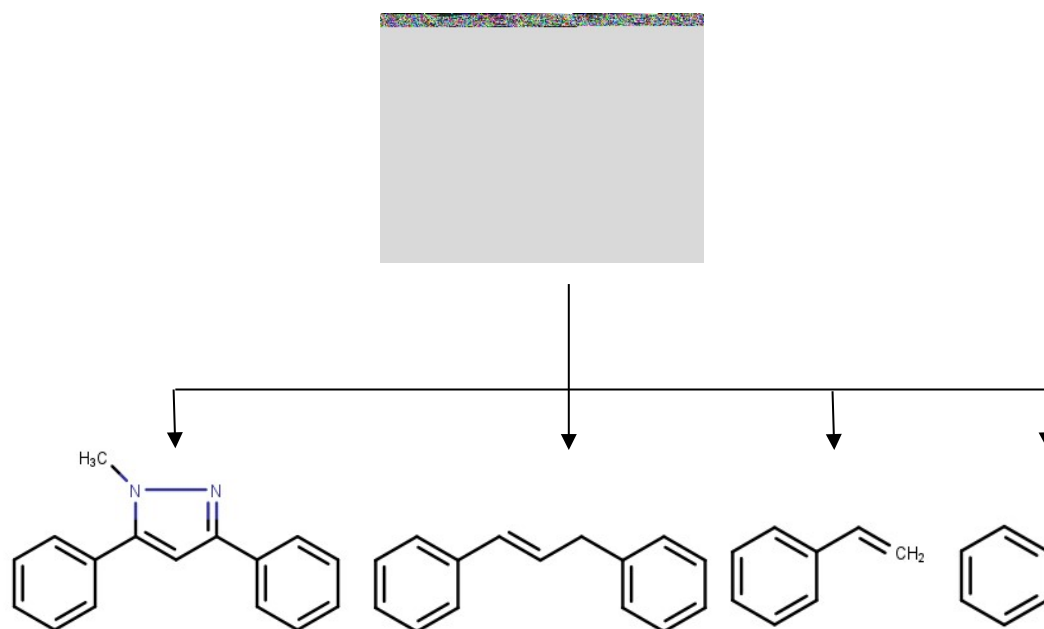



CI 13C

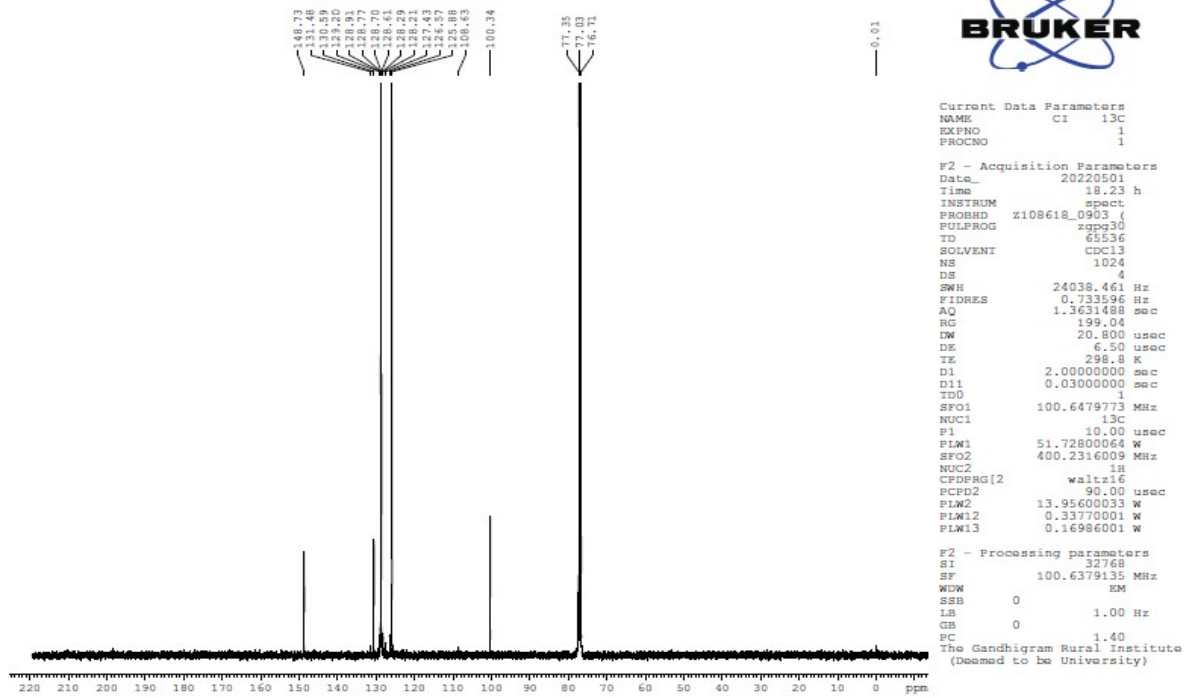

Figure 14. Mass spectra of compound CI

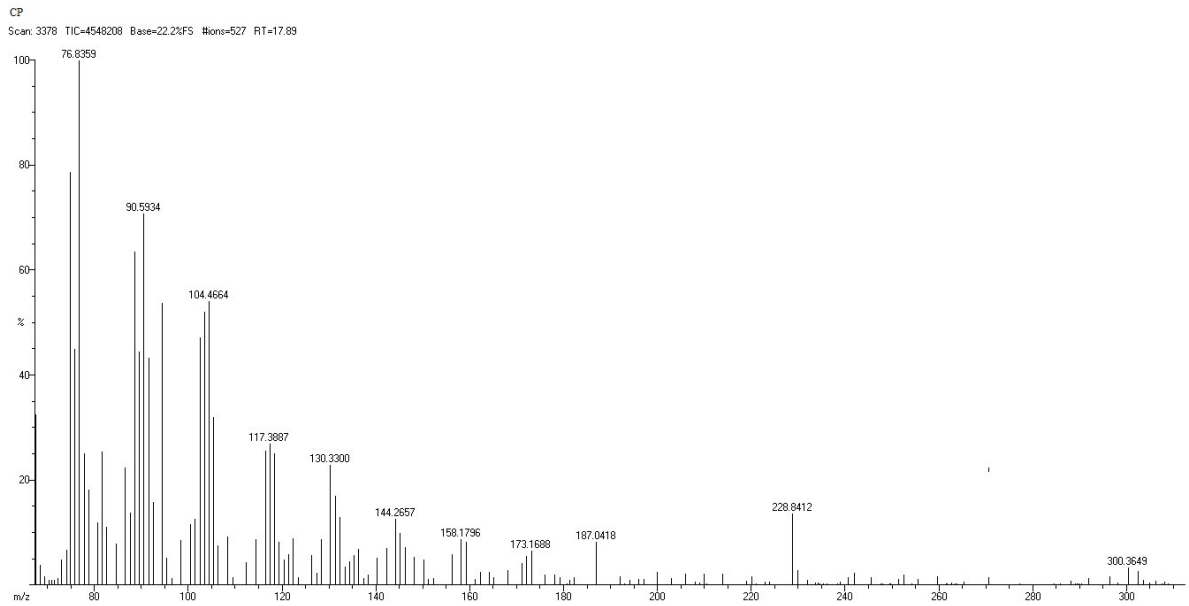

Figure 15. Mass fragmentation of compound CP

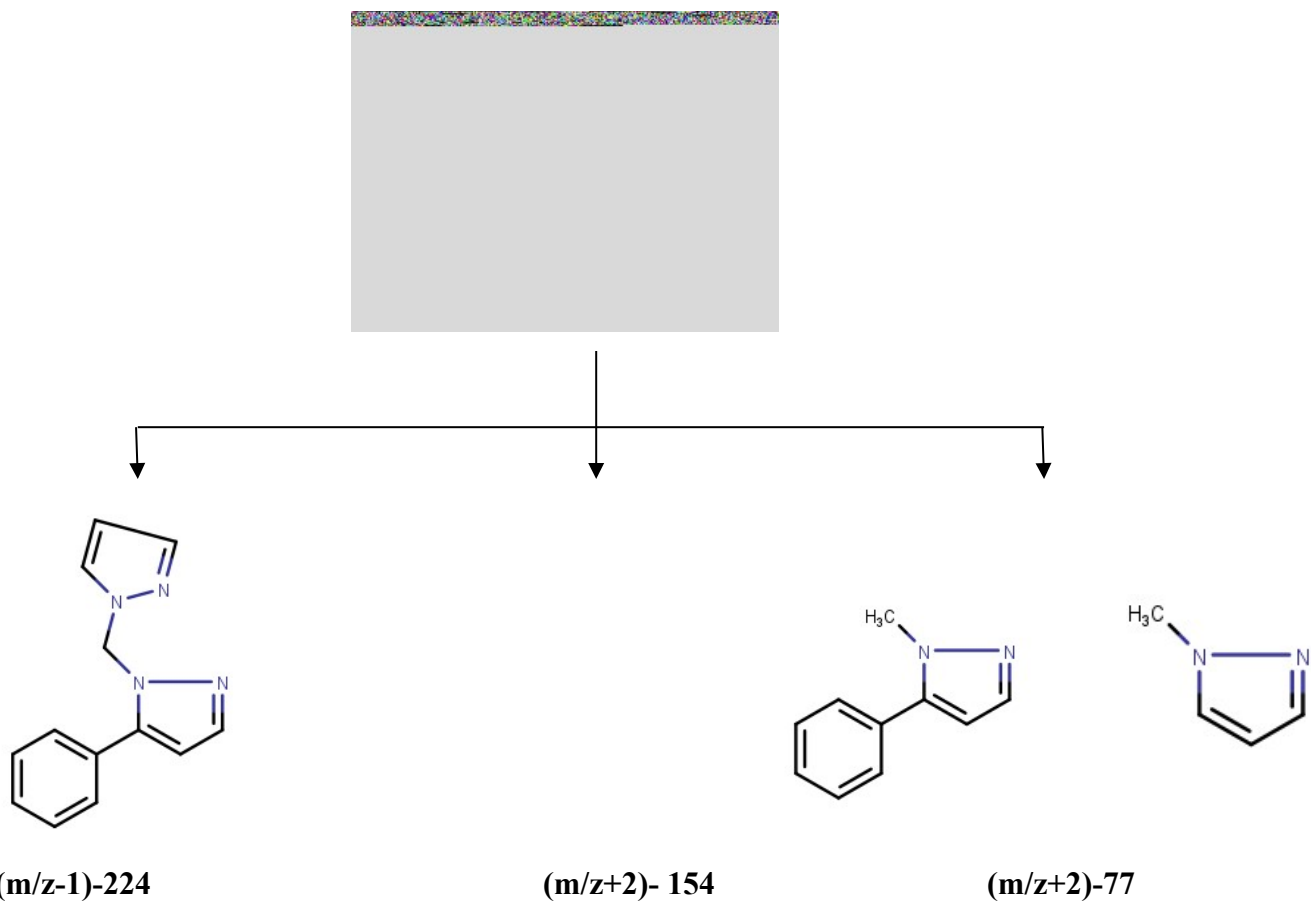

**Figure 16. IR spectra of compound CP**

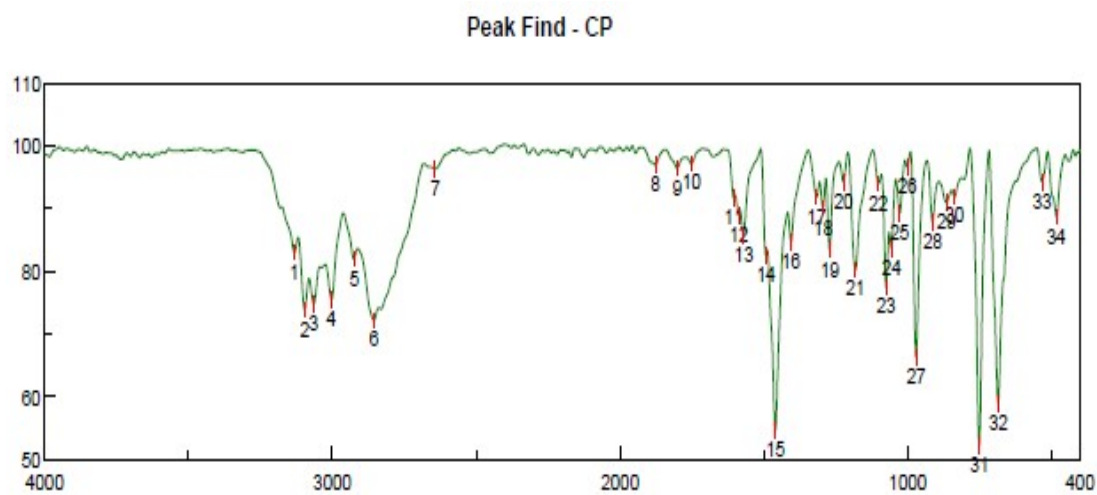

**Figure 17. H1 spectra of compound CP**



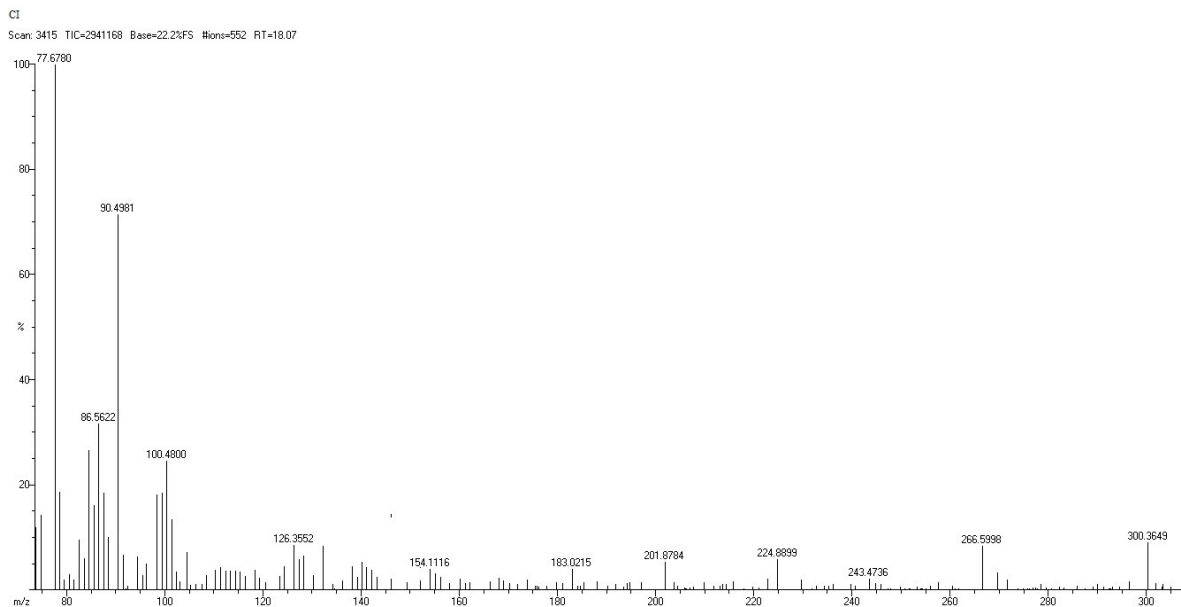

**Figure 20. Mass fragmentation of compound CDPA**

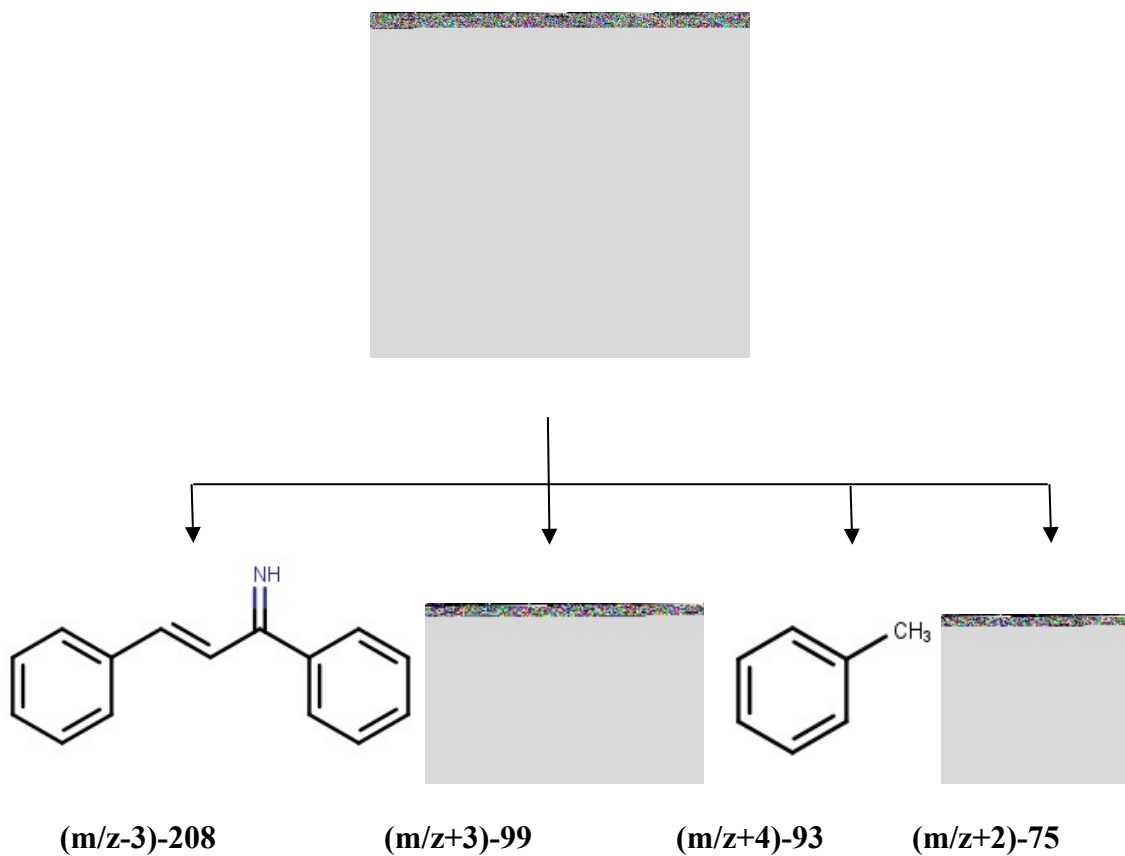

**Figure 21. IR spectra of compound CDPA**

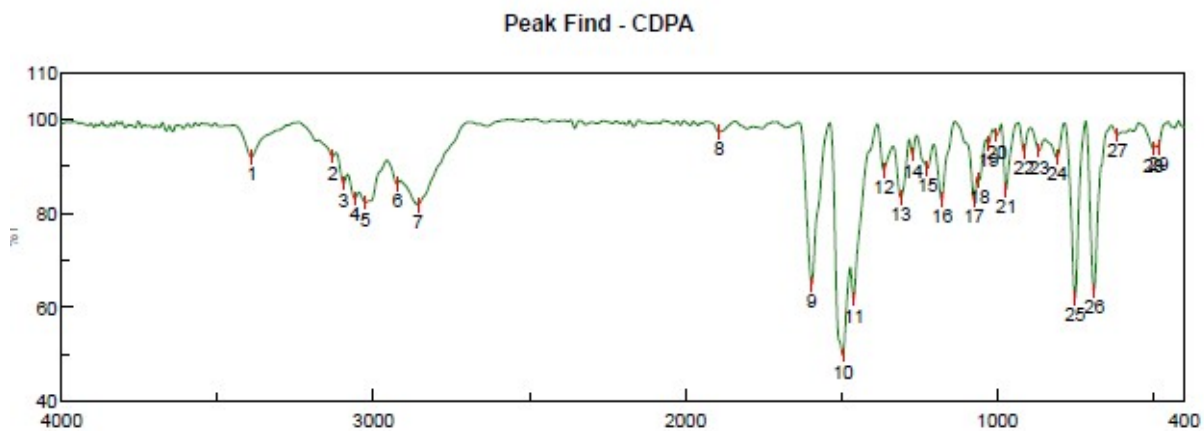

Figure 22. <sup>1</sup>H spectra of compound CDPA

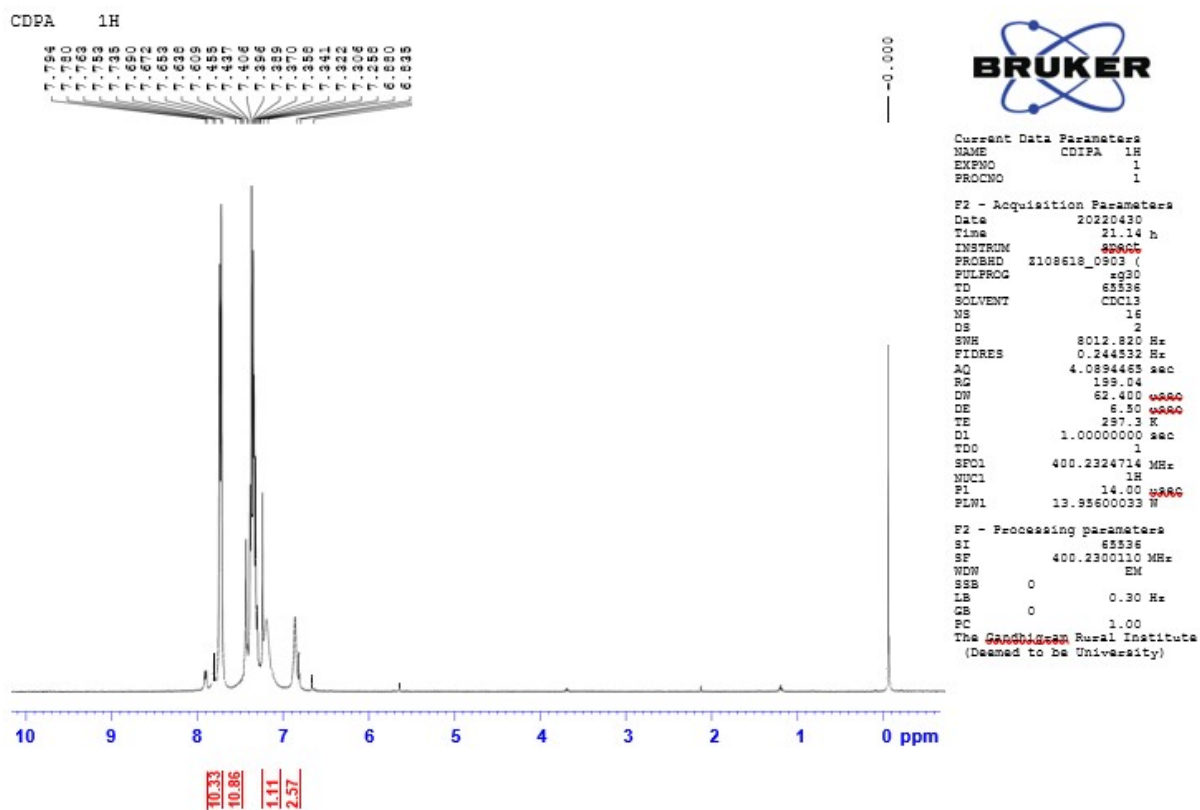

Figure 23. <sup>13</sup>C spectra of compound CDPA



CDPA 13C

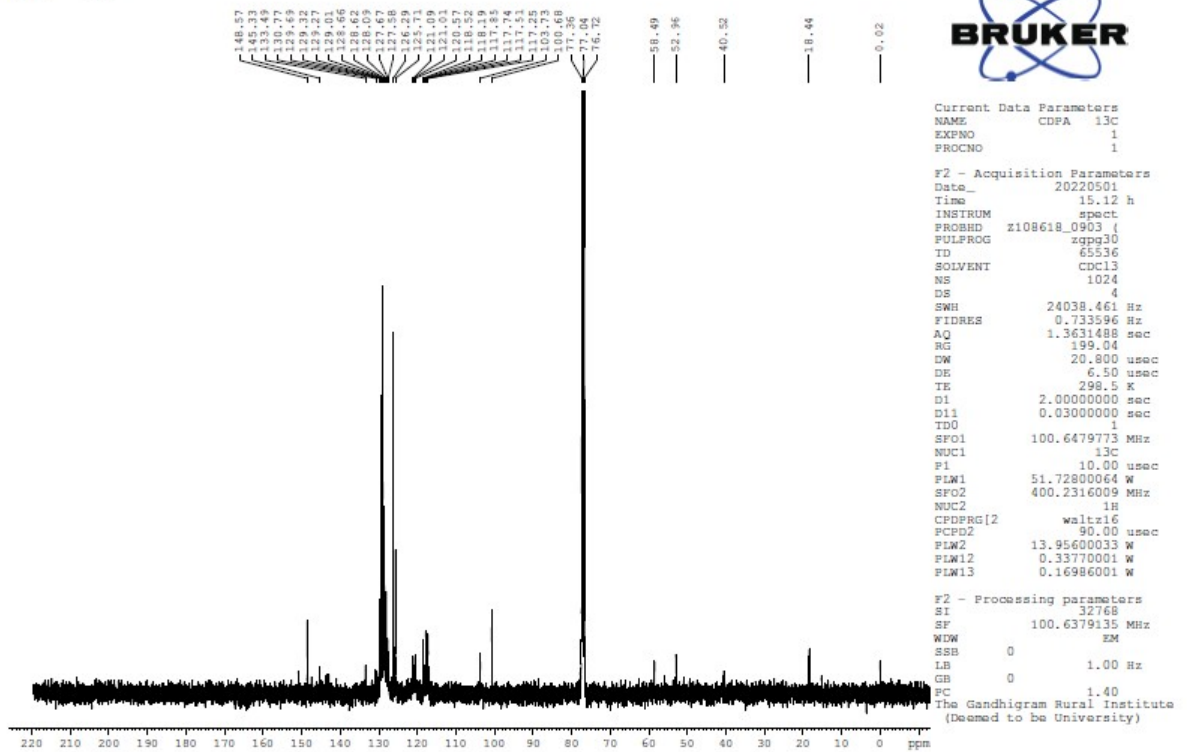

Figure 24. Mass spectra of compound CDPA

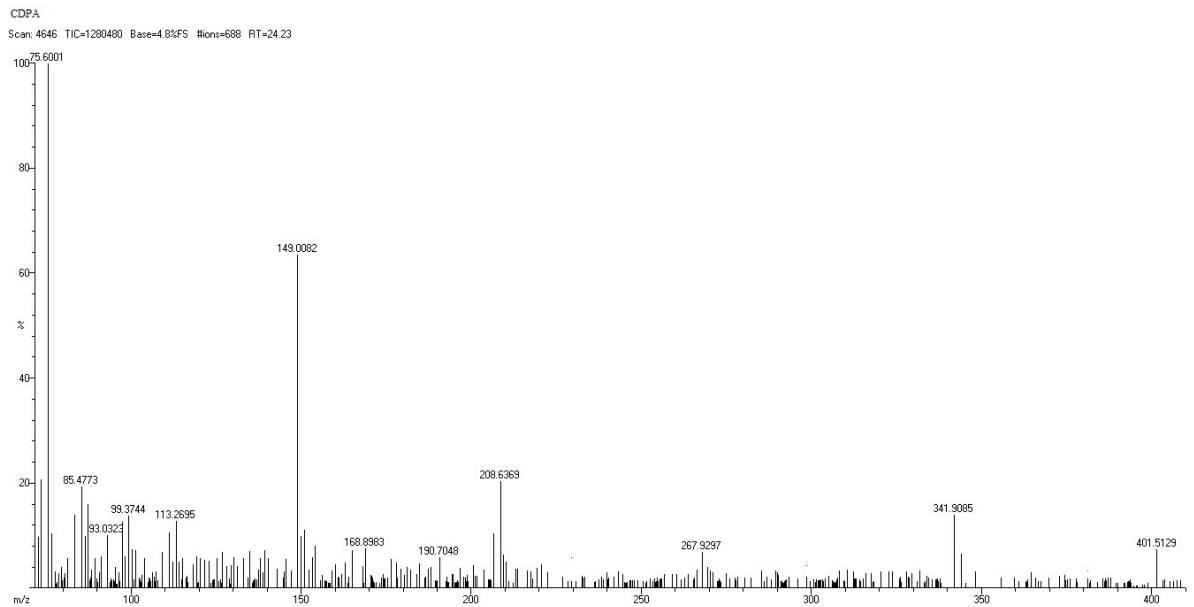

Figure 25. Mass fragmentation of compound CDEA

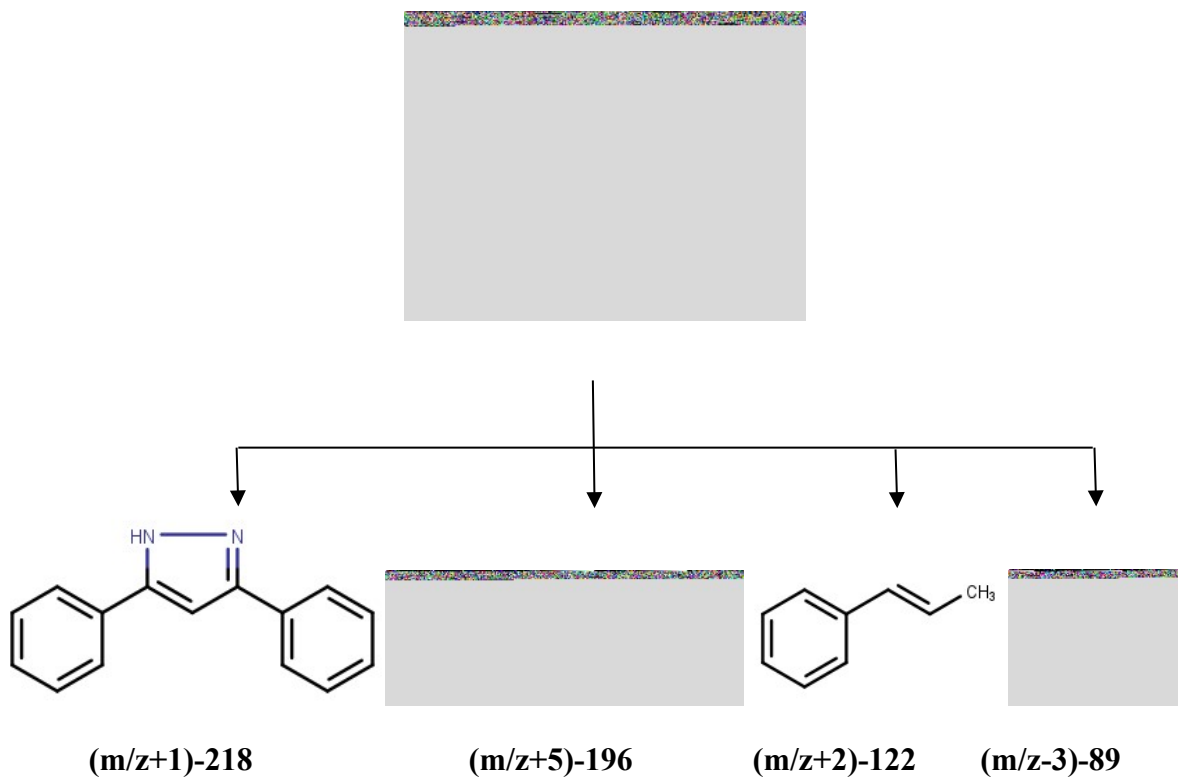

Figure 26. IR spectra of compound CDEA

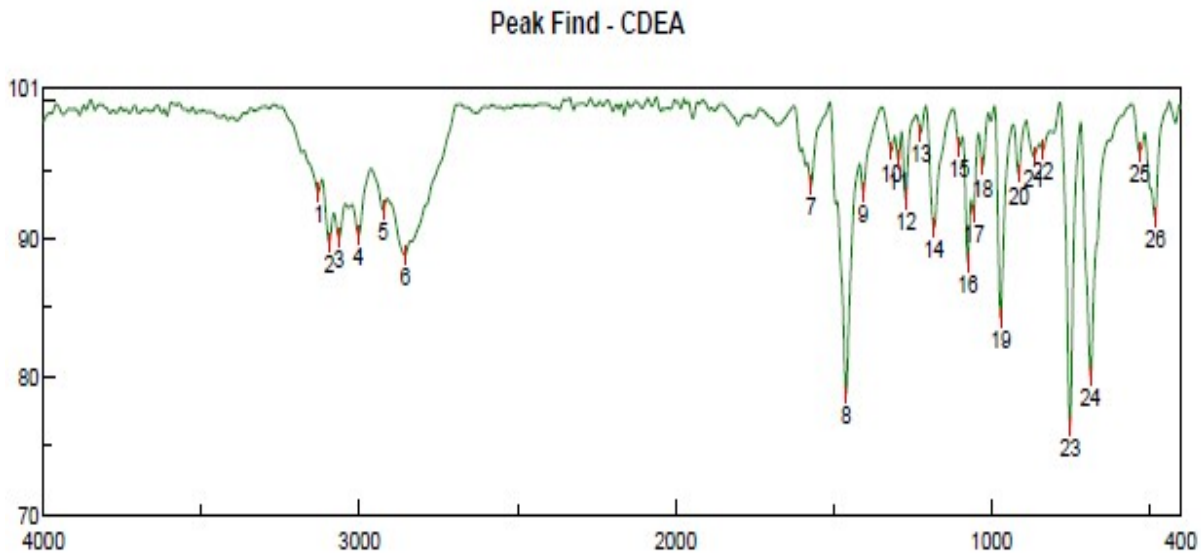

Figure 27. H1 spectra of compound CDEA

CDEA 1H

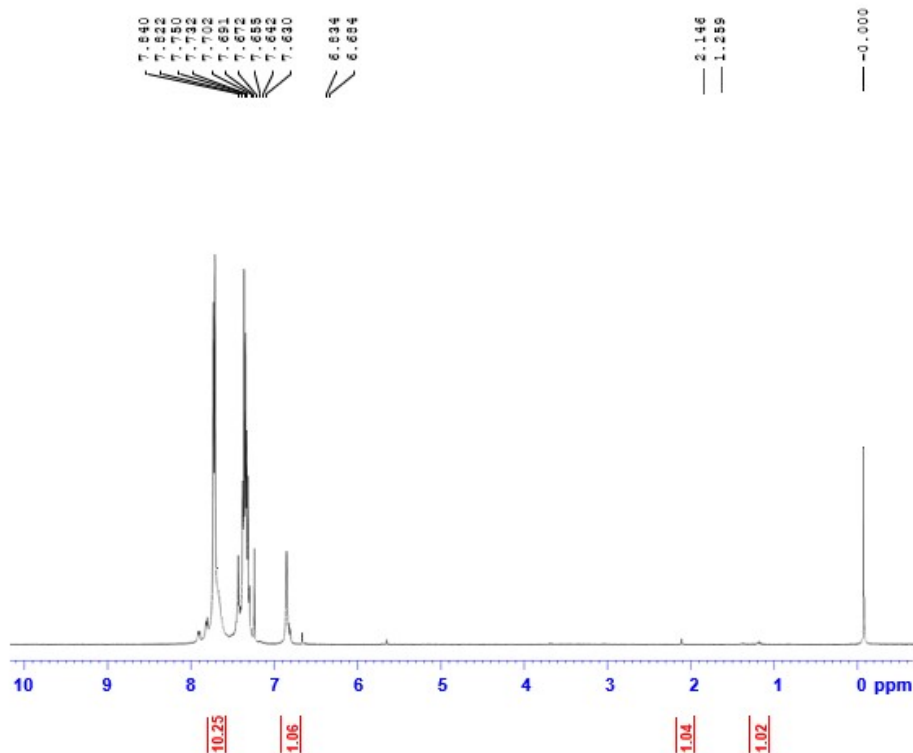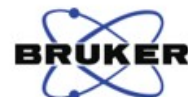

Current Data Parameters  
NAME CDEA 1H  
EXPNO 1  
PROCNO 1

F2 - Acquisition Parameters  
Date\_ 20220430  
Time 21.20 h  
INSTRUM spect  
PROBHD z108618\_0903 ( )  
PULPROG zg30  
TD 65536  
SOLVENT CDCl3  
NS 16  
DS 2  
SWH 8012.820 Hz  
FIDRES 0.244532 Hz  
AQ 4.0894465 sec  
RG 199.04  
DW 82.400 usec  
DE 6.50 usec  
TE 297.3 K  
D1 1.00000000 sec  
TDO 1  
SFO1 400.2324714 MHz  
NUC1 1H  
P1 14.00 usec  
PLW1 13.95600033 W

F2 - Processing parameters  
SI 65536  
SF 400.2300110 MHz  
WDW EM  
SSB 0  
LB 0.30 Hz  
GB 0  
PC 1.00  
The Gandhigram Rural Institute  
(Deemed to be University)

Figure 28. C13 spectra of compound CDEA

CDEA 13C

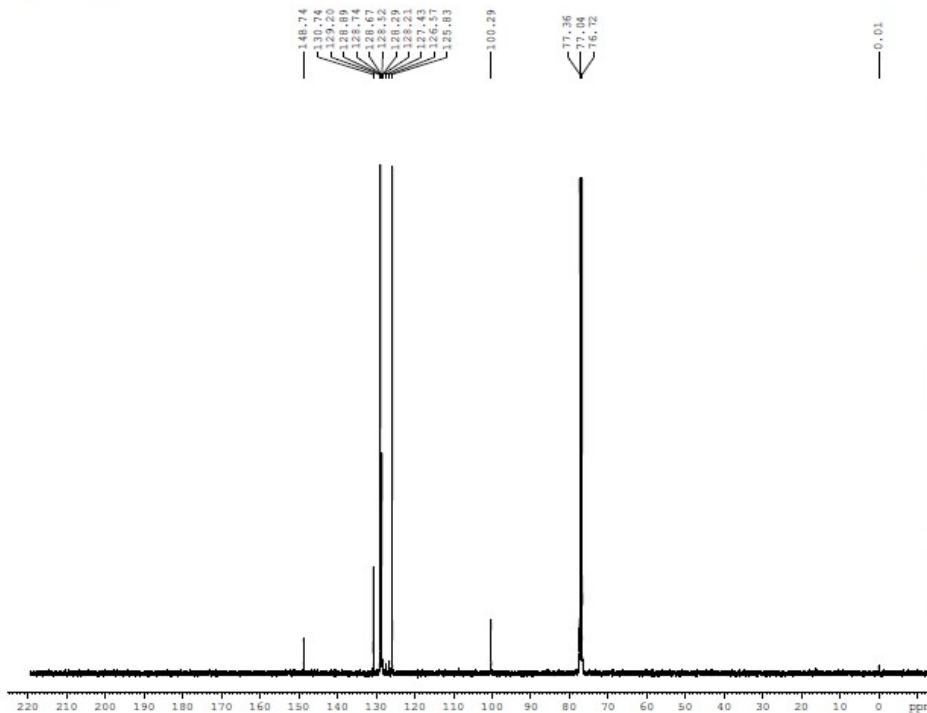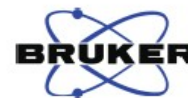

Current Data Parameters  
NAME CDEA 13C  
EXPNO 1  
PROCNO 1

F2 - Acquisition Parameters  
Date\_ 20220501  
Time 17.19 h  
INSTRUM spect  
PROBHD z108618\_0903 ( )  
PULPROG zgpg30  
TD 65536  
SOLVENT CDCl3  
NS 1024  
DS 4  
SWH 24038.461 Hz  
FIDRES 0.733596 Hz  
AQ 1.3631488 sec  
RG 199.04  
DW 20.800 usec  
DE 6.50 usec  
TE 298.6 K  
D1 2.00000000 sec  
D11 0.03000000 sec  
TDO 1  
SFO1 100.6479773 MHz  
NUC1 13C  
P1 10.00 usec  
PLW1 51.72800064 W  
SFO2 400.2316009 MHz  
NUC2 1H  
CPDPRG[2] waltz16  
PCPD2 90.00 usec  
PLW2 13.95600033 W  
PLW12 0.33770001 W  
PLW13 0.16986001 W

F2 - Processing parameters  
SI 32768  
SF 100.6379135 MHz  
WDW EM  
SSB 0  
LB 1.00 Hz  
GB 0  
PC 1.40  
The Gandhigram Rural Institute  
(Deemed to be University)

**Figure 29. Mass spectra of compound CDEA**

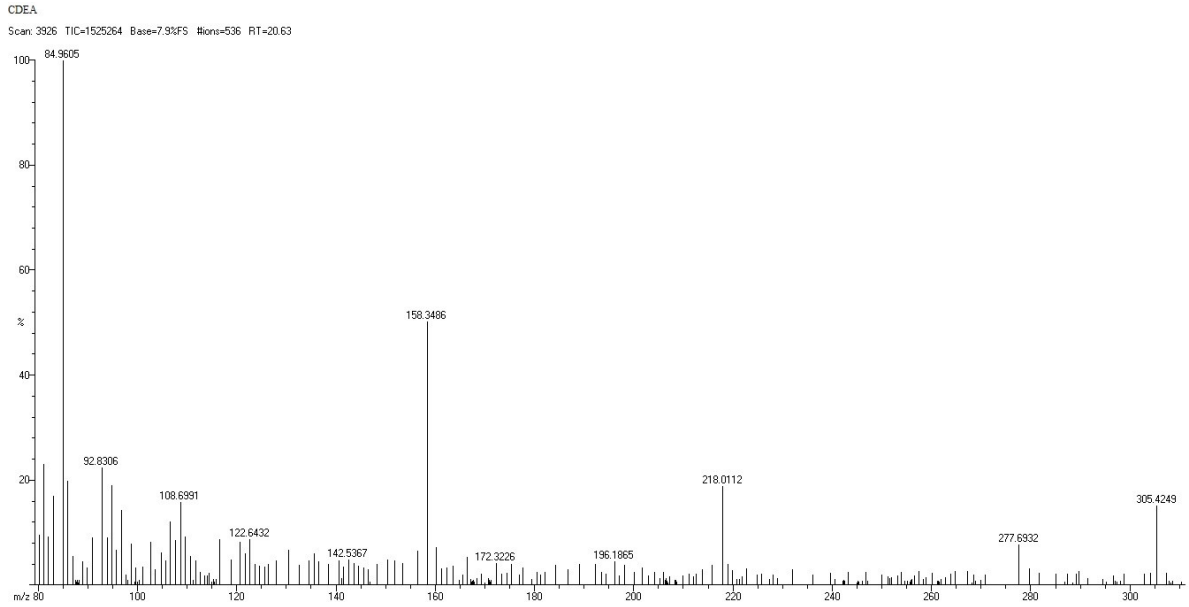

**Figure 30. Mass fragmentation of compound CDPA**

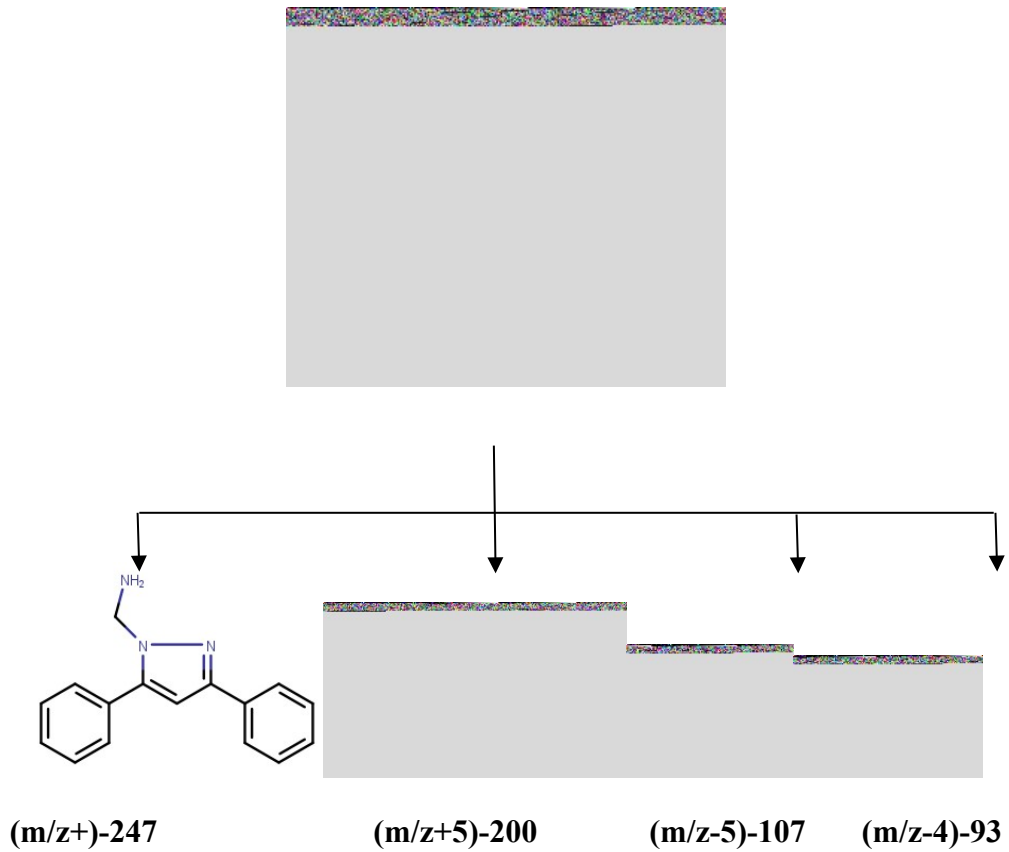

**Figure 31. IR spectra of compound CDIPA**

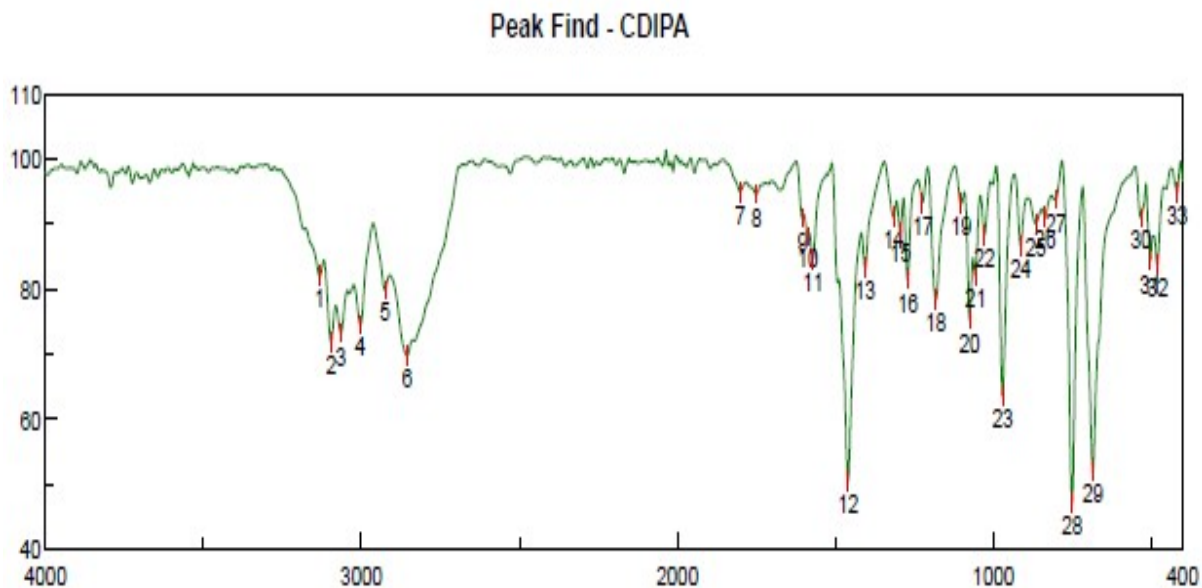

Figure 32. <sup>1</sup>H spectra of compound CDIPA

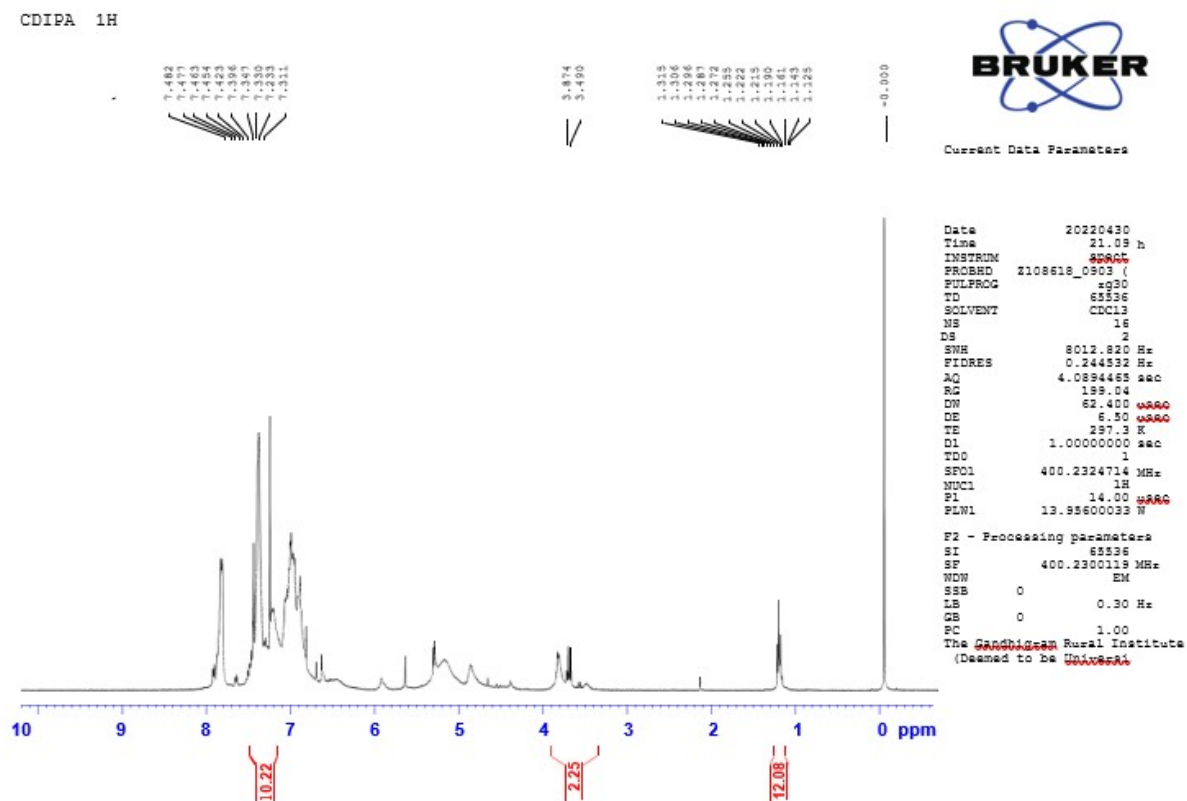

Figure 33. <sup>13</sup>C spectra of compound CDIPA

CDIPA 13C

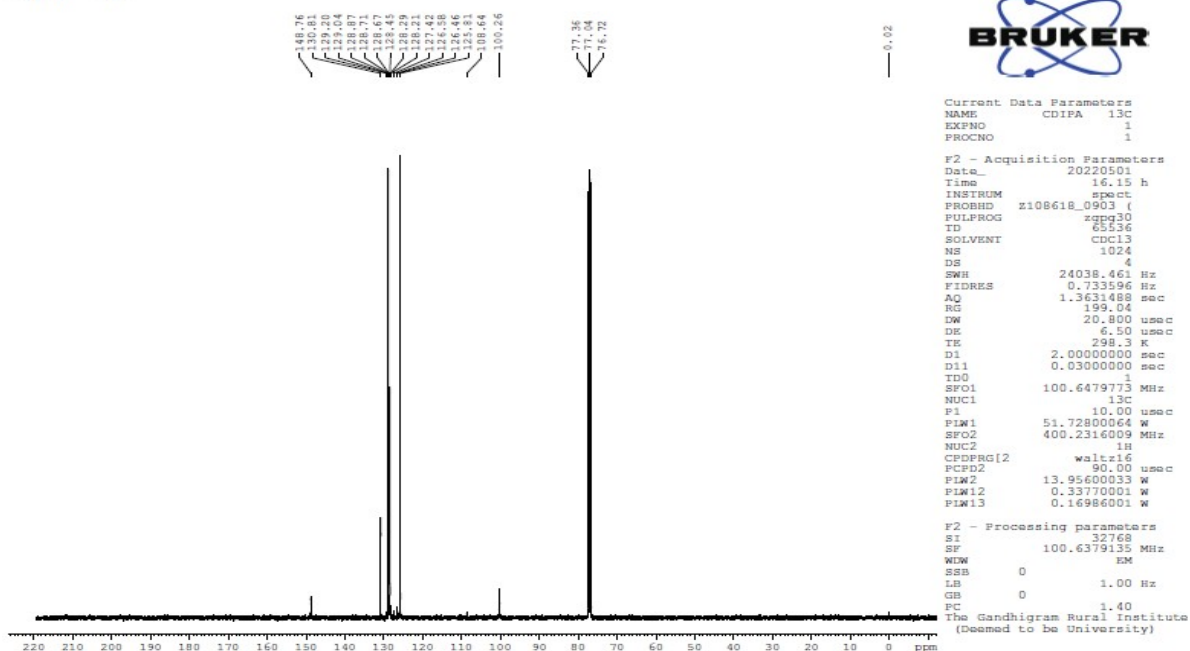

Figure 34. Mass spectra of compound CDIPA

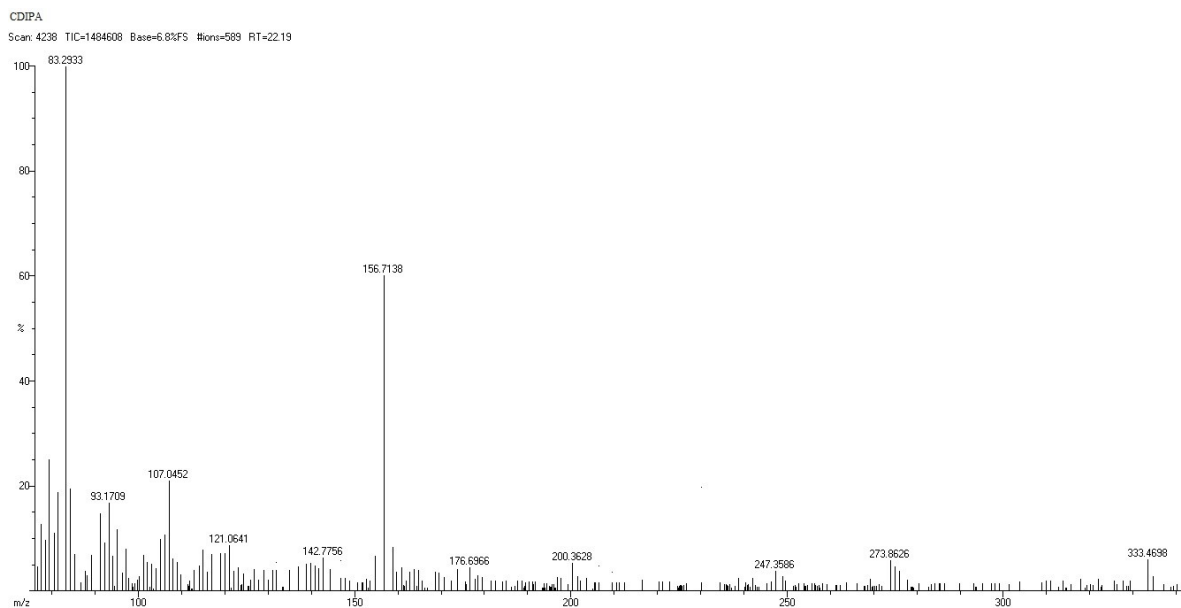

Figure 34. Graphical correlation of % viability with concentration  $\mu\text{g/ml}$  of the synthesized compounds. (X-concentration in  $\mu\text{g/ml}$  and Y-% viability)

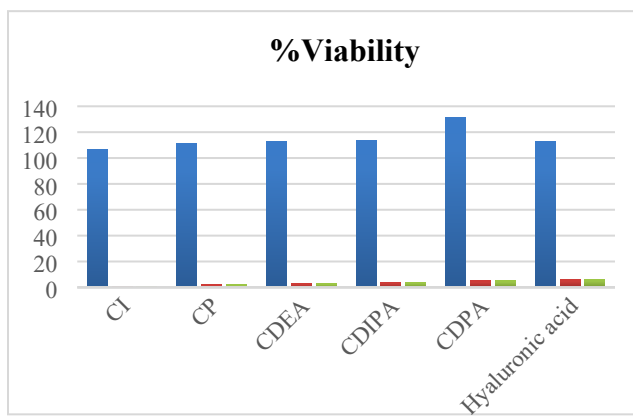

Figure 35. Effect of test drug (CI) on wound contraction

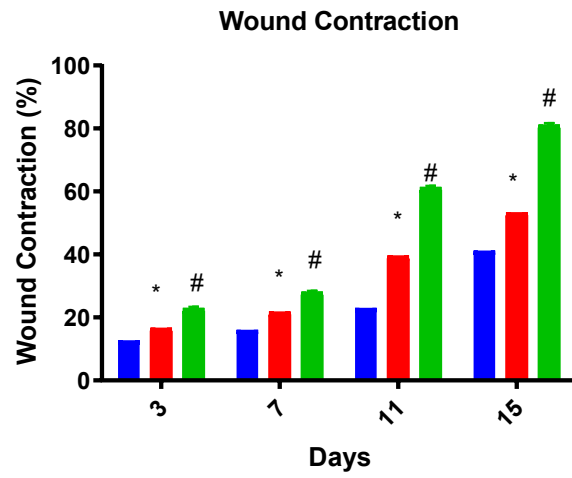

Supplement: d2ra05364k1.pdf [file d2ra05364k1.pdf]
